# Supplementary material for: Cross-Kingdom Analysis of Diversity, Evolutionary History, and Site Selection within the Eukaryotic Macrophage Migration Inhibitory Factor Superfamily
Source: MDPI journal article supplement (doi:10.3390/genes10100740), 2019-09-24
Supplement: s1 [file s1]

Table S1 : Comprehensive list of species searched for MIF protein sequences. The table shows the number of typical MIF sequences identified, the general environment (terrestrial, freshwater or marine), the life-style (free-living autotrophs, heterotrophs, and animal- or plant-parasites), as well as a short description (e.g. brown algae, fungi parasite, etc.). The presence/absence of a sequenced genome at the time of the search is indicated. The MIF sequences selected for the phylogenic reconstructions are indicated. Finally, the number of ESTs available at the time of the study are shown for species that did not possess a sequenced genome.

| Phyla                                  | Species                          | MIF number | Environment | Life-style            | Description                                        | Sequenced Genome | Selected for phylogeny reconstruction | ESTs (Number) |
|----------------------------------------|----------------------------------|------------|-------------|-----------------------|----------------------------------------------------|------------------|---------------------------------------|---------------|
| <b>Cryptophyta</b>                     |                                  |            |             |                       |                                                    |                  |                                       |               |
|                                        | <i>Chroomonas mesostigmatica</i> | 0          | marine      | autotrophic species   | algae                                              | present          | absent                                |               |
|                                        | <i>Cryptomonas paramecium</i>    | 0          | marine      | autotrophic species   | algae                                              | present          | absent                                |               |
|                                        | <i>Guillardia theta</i>          | 2          | marine      | autotrophic species   | algae                                              | present          | yes                                   |               |
| <b>Apusozoa</b>                        |                                  |            |             |                       |                                                    |                  |                                       |               |
|                                        | <i>Thecamonas trahens</i>        | 0          | marine      | heterotrophic species | free living, biflagellate                          | present          | absent                                |               |
| <b>Parabasalia</b>                     |                                  |            |             |                       |                                                    |                  |                                       |               |
|                                        | <i>Trichomonas vaginalis</i>     | 1          | terrestrial | animal parasites      | causes uro genital trichomonoze                    | present          | yes                                   |               |
| <b>Haptophyta</b>                      |                                  |            |             |                       |                                                    |                  |                                       |               |
|                                        | <i>Emiliania huxleyi</i>         | 1          | marine      | autotrophic species   | algae, phytoplankton, causes blooms                | present          | yes                                   |               |
| <b>Rhizaria --&gt; Cercomonads</b>     |                                  |            |             |                       |                                                    |                  |                                       |               |
|                                        | <i>Bigelowiella natans</i>       | 0          | marine      | autotrophic species   | model organisms, algae                             | present          | absent                                |               |
| <b>Rhizaria --&gt; Cercozoa</b>        |                                  |            |             |                       |                                                    |                  |                                       |               |
|                                        | <i>Lotharella oceanica</i>       | 0          | marine      | autotrophic species   | chlorarachniophyte algae, plankton                 | present          | absent                                |               |
|                                        | <i>Paulinella chromatophora</i>  | 0          | freshwater  | heterotrophic species | amoeba - free living - photosynthetic              | present          | absent                                |               |
|                                        | <i>Plasmodiophora brassicae</i>  | 0          | terrestrial | plant parasites       | causes clubroot                                    | present          | absent                                |               |
| <b>Rhizaria --&gt; Foraminifera</b>    |                                  |            |             |                       |                                                    |                  |                                       |               |
|                                        | <i>Reticulomyxa filosa</i>       | 0          | freshwater  | heterotrophic species | foraminifers                                       | present          | absent                                |               |
| <b>Excavates --&gt; Diplomonads</b>    |                                  |            |             |                       |                                                    |                  |                                       |               |
|                                        | <i>Giardia intestinalis</i>      | 2          | terrestrial | animal parasites      | causes giardiasis, flagellated parasite            | present          | yes                                   |               |
|                                        | <i>Giardia lamblia</i>           | 2          | terrestrial | animal parasites      | causes giardiasis, flagellated parasite            | present          | yes                                   |               |
|                                        | <i>Spironucleus salmonicida</i>  | 2          | terrestrial | animal parasites      | fish parasite, systemic infection in salmonid fish | present          | yes                                   |               |
| <b>Excavates --&gt; Kinetoplastids</b> |                                  |            |             |                       |                                                    |                  |                                       |               |
|                                        | <i>Leishmania braziliensis</i>   | 1          | terrestrial | animal parasites      | causes leishmaniasis                               | present          | no                                    |               |
|                                        | <i>Leishmania donovani</i>       | 2          | terrestrial | animal parasites      | causes leishmaniasis                               | present          | yes                                   |               |
|                                        | <i>Leishmania infantum</i>       | 2          | terrestrial | animal parasites      | causes leishmaniasis                               | present          | yes                                   |               |
|                                        | <i>Leishmania major</i>          | 2          | terrestrial | animal parasites      | causes leishmaniasis                               | present          | yes                                   |               |
|                                        | <i>Leishmania mexicana</i>       | 2          | terrestrial | animal parasites      | causes leishmaniasis                               | present          | yes                                   |               |
|                                        | <i>Leishmania panamensis</i>     | 1          | terrestrial | animal parasites      | causes leishmaniasis                               | present          | no                                    |               |
|                                        | <i>Phytomonas sp</i>             | 0          | terrestrial | plant parasites       | conveyed by bugs                                   | present          | absent                                |               |
|                                        | <i>Strigomonas culicis</i>       | 1          | terrestrial | animal parasites      | infects and colonizes the <i>Aedes aegypti</i>     | present          | yes                                   |               |
|                                        | <i>Trypanosoma brucei</i>        | 0          | terrestrial | animal parasites      | causes trypanosomiasis, flagellate parasite        | present          | absent                                |               |
|                                        | <i>Trypanosoma cruzi</i>         | 0          | terrestrial | animal parasites      | causes trypanosomiasis, flagellate parasite        | present          | absent                                |               |
|                                        | <i>Trypanosoma rangeli</i>       | 0          | terrestrial | animal parasites      | causes trypanosomiasis, flagellate parasite        | present          | absent                                |               |

|                                            |                                       |   |             |                      |                                                                                    |         |        |         |
|--------------------------------------------|---------------------------------------|---|-------------|----------------------|------------------------------------------------------------------------------------|---------|--------|---------|
| <b>Excavates --&gt; Heterolobozoa</b>      |                                       |   |             |                      |                                                                                    |         |        |         |
|                                            | <i>Naegleria gruberi</i>              | 0 | fresh water | heterorophic species | amoeba, free - living organism                                                     | present | absent |         |
| <b>Amoebozoa --&gt; Mycetozoa</b>          |                                       |   |             |                      |                                                                                    |         |        |         |
|                                            | <i>Dictyostelium discoideum</i>       | 0 | terrestrial | heterorophic species | soil - living amoeba                                                               | present | absent |         |
|                                            | <i>Dictyostelium fasciculatum</i>     | 0 | terrestrial | heterorophic species | soil - living amoeba                                                               | present | absent |         |
|                                            | <i>Dictyostelium purpureum</i>        | 0 | terrestrial | heterorophic species | soil - living amoeba                                                               | present | absent |         |
|                                            | <i>Polysphondylium pallidum</i>       | 0 | terrestrial | heterorophic species | amoeba                                                                             | present | absent |         |
| <b>Amoebozoa --&gt; Archamoebae</b>        |                                       |   |             |                      |                                                                                    |         |        |         |
|                                            | <i>Entamoeba dispar</i>               | 0 | terrestrial | animal parasites     | pathogenic amoeba, causes amoebiasis, dysentery                                    | present | absent |         |
|                                            | <i>Entamoeba histolytica</i>          | 1 | terrestrial | animal parasites     | pathogenic amoeba, causes amoebiasis, dysentery                                    | present | yes    |         |
|                                            | <i>Entamoeba invadens</i>             | 2 | terrestrial | animal parasites     | pathogenic amoeba, causes amoebiasis, dysentery                                    | present | yes    |         |
|                                            | <i>Entamoeba nuttalli</i>             | 0 | terrestrial | animal parasites     | pathogenic amoeba, causes amoebiasis, dysentery                                    | present | absent |         |
| <b>Amoebozoa --&gt; Discosea</b>           |                                       |   |             |                      |                                                                                    |         |        |         |
|                                            | <i>Acanthamoeba castellanii</i>       | 0 | fresh water | animal parasites     | amoeba, bacterivores, cause acanthamebiasis                                        | present | absent |         |
| <b>Straminipila</b>                        |                                       |   |             |                      |                                                                                    |         |        |         |
|                                            | <i>Blastocystis hominis</i>           | 0 | terrestrial | animal parasites     | cause stomach problem in humans                                                    | present | absent |         |
| <b>Straminipila --&gt; Synurophyceae</b>   |                                       |   |             |                      |                                                                                    |         |        |         |
|                                            | <i>Poteroiochromonas</i> sp.          | 1 | freshwater  | autotrophic species  | heterokont algae, photosynthetic                                                   | absent  | yes    | 0       |
|                                            | <i>Synura</i> sp.                     | 1 | freshwater  | autotrophic species  | heterokont algae, photosynthetic                                                   | absent  | no     | 0       |
| <b>Straminipila --&gt; Bacillariophyta</b> |                                       |   |             |                      |                                                                                    |         |        |         |
|                                            | <i>Chaetoceros affinis</i>            | 1 | marine      | autotrophic species  | diatom (brown algae), phytoplankton                                                | absent  | no     | 0       |
|                                            | <i>Leptocylindrus danicus</i>         | 1 | marine      | autotrophic species  | diatom (brown algae), phytoplankton                                                | absent  | no     | 0       |
|                                            | <i>Nitzschia</i> sp.                  | 1 | marine      | autotrophic species  | diatom (brown algae), phytoplankton, produces neurotoxin, grow at cold temperature | absent  | yes    | 0       |
|                                            | <i>Phaeodactylum tricornutum</i>      | 1 | marine      | autotrophic species  | diatom (brown algae) phytoplankton                                                 | present | yes    |         |
|                                            | <i>Thalassiosira oceanica</i>         | 1 | marine      | autotrophic species  | phytoplankton, diatom (brown algae), symbiosis with bacteria                       | present | yes    |         |
| <b>Straminipila --&gt; Oomycetes</b>       |                                       |   |             |                      |                                                                                    |         |        |         |
|                                            | <i>Albugo candida</i>                 | 0 | terrestrial | plant parasites      | obligatory biotrophic plant parasite, cause white blister rust                     | present | absent |         |
|                                            | <i>Aphanomyces astaci</i>             | 0 | terrestrial | animal parasites     | crayfish parasites,                                                                | present | absent |         |
|                                            | <i>Aphanomyces invadans</i>           | 0 | terrestrial | animal parasites     | fish parasite                                                                      | present | absent |         |
|                                            | <i>Hyaloperonospora arabidopsidis</i> | 0 | terrestrial | plant parasites      | causes mildew                                                                      | present | absent |         |
|                                            | <i>Phytophthora capsici</i>           | 4 | terrestrial | plant parasites      | mildew                                                                             | absent  | yes    | 58.277  |
|                                            | <i>Phytophthora cinamoni</i>          | 4 | terrestrial | plant parasites      | mildew                                                                             | absent  | yes    | 330.482 |
|                                            | <i>Phytophthora infestans</i>         | 2 | terrestrial | plant parasites      | mildew                                                                             | present | yes    |         |
|                                            | <i>Phytophthora kernoviae</i>         | 2 | terrestrial | plant parasites      | mildew                                                                             | present | yes    |         |
|                                            | <i>Phytophthora lateralis</i>         | 3 | terrestrial | plant parasites      | mildew                                                                             | present | yes    |         |

|                                              |                                    |   |             |                       |                                                                    |         |        |        |
|----------------------------------------------|------------------------------------|---|-------------|-----------------------|--------------------------------------------------------------------|---------|--------|--------|
|                                              | <i>Phytophthora nicotianae</i>     | 3 | terrestrial | plant parasites       | cause root rot, crown rot, leaf infection                          | present | yes    |        |
|                                              | <i>Phytophthora parasitica</i>     | 3 | terrestrial | plant parasites       | soilborne pathogen                                                 | present | yes    |        |
|                                              | <i>Phytophthora ramorum</i>        | 4 | terrestrial | plant parasites       | causes the disease sudden oak death (SOD)                          | present | yes    |        |
|                                              | <i>Phytophthora sojae</i>          | 5 | terrestrial | plant parasites       | causes damping - off                                               | present | yes    |        |
|                                              | <i>Plasmopara halstedii</i>        | 1 | terrestrial | plant parasites       | causes sunflowers mildew                                           | present | yes    |        |
|                                              | <i>Pythium aphanidermatum</i>      | 4 | terrestrial | plant parasites       | mildew                                                             | present | yes    |        |
|                                              | <i>Pythium arrhenomanes</i>        | 2 | terrestrial | plant parasites       | mildew                                                             | present | yes    |        |
|                                              | <i>Pythium irregulare</i>          | 2 | terrestrial | plant parasites       | mildew                                                             | present | yes    |        |
|                                              | <i>Pythium iwayamai</i>            | 4 | terrestrial | plant parasites       | mildew                                                             | present | yes    |        |
|                                              | <i>Pythium ultimum</i>             | 4 | terrestrial | plant parasites       | mildew                                                             | present | yes    |        |
|                                              | <i>Pythium vexans</i>              | 4 | terrestrial | plant parasites       | mildew                                                             | present | yes    |        |
|                                              | <i>Saprolegnia diclina</i>         | 0 | terrestrial | animal parasites      | amphibian and fish parasites, causes oomycosis, secondary pathogen | present | absent |        |
| <b>Straminipila --&gt; Phaeophyceae</b>      |                                    |   |             |                       |                                                                    |         |        |        |
|                                              | <i>Ectocarpus siliculosus</i>      | 0 | marine      | autotrophic species   | brown algae                                                        | present | absent |        |
|                                              | <i>Sargassum vulgare</i>           | 1 | marine      | autotrophic species   | brown algae                                                        | absent  | no     | 0      |
| <b>Straminipila --&gt; Pelagophyceae</b>     |                                    |   |             |                       |                                                                    |         |        |        |
|                                              | <i>Aureococcus anophagefferens</i> | 1 | marine      | autotrophic species   | algae, causes algal blooms                                         | present | yes    |        |
|                                              | <i>Aureoumbra lagunensis</i>       | 1 | marine      | heterotrophic species | picoplankton                                                       | absent  | yes    | 0      |
| <b>Straminipila --&gt; Eustigmatophyceae</b> |                                    |   |             |                       |                                                                    |         |        |        |
|                                              | <i>Nannochloropsis gaditana</i>    | 2 | fresh water | autotrophic species   | microalgae, phytoplankton                                          | present | yes    |        |
| <b>Alveolata --&gt; Dinophyceae</b>          |                                    |   |             |                       |                                                                    |         |        |        |
|                                              | <i>Alexandrium tamarense</i>       | 1 | marine      | autotrophic species   | phytoplankton, algae                                               | absent  | no     | 10.887 |
|                                              | <i>Gambierdiscus excentricus</i>   | 1 | marine      | autotrophic species   | brown macroalgae, produce toxins, algae                            | absent  | no     | 0      |
|                                              | <i>Lingulodinium polyedrum</i>     | 1 | marine      | autotrophic species   | algae, motile dinoflagellates, production of Yessotoxins (YTXs)    | absent  | no     | 3.640  |
|                                              | <i>Perkinsus marinus</i>           | 0 | marine      | animal parasites      | pathogen of oysters, , algae                                       | present | absent |        |
|                                              | <i>Symbiodinium minutum</i>        | 2 | marine      | autotrophic species   | endosymbiotic dinoflagellates, algae                               | present | yes    |        |
| <b>Alveolata --&gt; Apicomplexa</b>          |                                    |   |             |                       |                                                                    |         |        |        |
|                                              | <i>Babesia bigemina</i>            | 0 | terrestrial | animal parasites      | causes babesiosis                                                  | present | absent |        |
|                                              | <i>Babesia bovis</i>               | 0 | terrestrial | animal parasites      | causes babesiosis                                                  | present | absent |        |
|                                              | <i>Cryptosporidium hominis</i>     | 0 | terrestrial | animal parasites      | obligate humans parasite, causes cryptosporidiosis                 | present | absent |        |
|                                              | <i>Eimeria acervulina</i>          | 1 | terrestrial | animal parasites      | causes coccidiosis                                                 | present | yes    |        |
|                                              | <i>Eimeria brunetti</i>            | 1 | terrestrial | animal parasites      | causes coccidiosis                                                 | present | yes    |        |
|                                              | <i>Eimeria maxima</i>              | 1 | terrestrial | animal parasites      | causes coccidiosis                                                 | present | yes    |        |
|                                              | <i>Eimeria mitis</i>               | 1 | terrestrial | animal parasites      | causes coccidiosis                                                 | present | yes    |        |
|                                              | <i>Eimeria necatrix</i>            | 1 | terrestrial | animal parasites      | causes coccidiosis                                                 | present | yes    |        |
|                                              | <i>Eimeria praecox</i>             | 1 | terrestrial | animal parasites      | causes coccidiosis                                                 | present | yes    |        |
|                                              | <i>Eimeria tenella</i>             | 1 | terrestrial | animal parasites      | causes coccidiosis                                                 | present | yes    |        |
|                                              | <i>Gregarina niphandrodes</i>      | 1 | terrestrial | animal parasites      | invertebrate parasite                                              | present | yes    |        |
|                                              | <i>Hammondia hammondi</i>          | 1 | terrestrial | animal parasites      | dogs parasite                                                      | present | yes    |        |
|                                              | <i>Neospora caninum</i>            | 1 | terrestrial | animal parasites      | causes neosporosis                                                 | present | yes    |        |
|                                              | <i>Plasmodium berghei</i>          | 1 | terrestrial | animal parasites      | causes malaria                                                     | present | yes    |        |
|                                              | <i>Plasmodium chabaudi</i>         | 1 | terrestrial | animal parasites      | causes malaria                                                     | present | yes    |        |

|                                                                                 |                                       |   |             |                      |                                                              |         |        |  |
|---------------------------------------------------------------------------------|---------------------------------------|---|-------------|----------------------|--------------------------------------------------------------|---------|--------|--|
|                                                                                 | <i>Plasmodium cynomolgi</i>           | 1 | terrestrial | animal parasites     | causes malaria                                               | present | yes    |  |
|                                                                                 | <i>Plasmodium falciparum</i>          | 1 | terrestrial | animal parasites     | causes malaria                                               | present | yes    |  |
|                                                                                 | <i>Plasmodium fragile</i>             | 1 | terrestrial | animal parasites     | causes malaria                                               | present | yes    |  |
|                                                                                 | <i>Plasmodium inui</i>                | 1 | terrestrial | animal parasites     | causes malaria                                               | present | yes    |  |
|                                                                                 | <i>Plasmodium knowlesi</i>            | 1 | terrestrial | animal parasites     | causes malaria                                               | present | yes    |  |
|                                                                                 | <i>Plasmodium reichenowi</i>          | 1 | terrestrial | animal parasites     | causes malaria                                               | present | yes    |  |
|                                                                                 | <i>Plasmodium vinckei</i>             | 1 | terrestrial | animal parasites     | causes malaria                                               | present | yes    |  |
|                                                                                 | <i>Plasmodium vivax</i>               | 1 | terrestrial | animal parasites     | causes malaria                                               | present | yes    |  |
|                                                                                 | <i>Plasmodium yoelii</i>              | 1 | terrestrial | animal parasites     | causes malaria                                               | present | yes    |  |
|                                                                                 | <i>Theileria annulata</i>             | 0 | terrestrial | animal parasites     | causes theileriosis (east coast fever)                       | present | absent |  |
|                                                                                 | <i>Theileria orientalis</i>           | 0 | terrestrial | animal parasites     | causes theileriosis (east coast fever)                       | present | absent |  |
|                                                                                 | <i>Theileria parva</i>                | 0 | terrestrial | animal parasites     | causes theileriosis (east coast fever)                       | present | absent |  |
|                                                                                 | <i>Toxoplasma gondii</i>              | 1 | terrestrial | animal parasites     | causes toxoplasmosis                                         | present | yes    |  |
| <b>Alveolata --&gt; Chromerida</b>                                              |                                       |   |             |                      |                                                              |         |        |  |
|                                                                                 | <i>Vitrella brassicaformis</i>        | 2 | marine      | autotrophic species  | isolated from the Great Barrier Reef, mixotrophe             | present | yes    |  |
| <b>Alveolata --&gt; Ciliophora</b>                                              |                                       |   |             |                      |                                                              |         |        |  |
|                                                                                 | <i>Ichthyophthirius multifiliis</i>   | 0 | fresh water | animal parasites     | fish parasite (causes ichthyophthiriosis)                    | present | absent |  |
|                                                                                 | <i>Oxytricha trifallax</i>            | 0 | fresh water | heterorophic species | free living, very mobile                                     | present | absent |  |
|                                                                                 | <i>Paramecium tetraurelia</i>         | 0 | fresh water | heterorophic species | phagocytose bacteria                                         | present | absent |  |
|                                                                                 | <i>Stylonichia lemnae</i>             | 0 | fresh water | heterorophic species | free living, carnivorous (eat other protozoans and bacteria) | present | absent |  |
|                                                                                 | <i>Tetrahymena thermophila</i>        | 0 | fresh water | heterorophic species | commensalistic                                               | present | absent |  |
| <b>Opisthokonts --&gt; Ichthyospora</b>                                         |                                       |   |             |                      |                                                              |         |        |  |
|                                                                                 | <i>Capsaspora owczarzaki</i>          | 0 | fresh water | animal parasites     | amoeboid, snail parasite and kill the sporocysts of flatworm | present | absent |  |
| <b>Opisthokonts --&gt; Nucleariids</b>                                          |                                       |   |             |                      |                                                              |         |        |  |
|                                                                                 | <i>Fonticula alba</i>                 | 0 | terrestrial | heterorophic species | amoeboid - free living                                       | present | absent |  |
| <b>Opisthokonts --&gt; Choanoflagellata</b>                                     |                                       |   |             |                      |                                                              |         |        |  |
|                                                                                 | <i>Monosiga brevicollis</i>           | 0 | marine      | heterorophic species | free living, nanoplankton                                    | present | absent |  |
|                                                                                 | <i>Salpingoeca rosetta</i>            | 1 | fresh water | heterorophic species | free living                                                  | present | yes    |  |
| <b>Opisthokonts --&gt; Dikarya --&gt; Basidiomycota --&gt; Pucciniomycotina</b> |                                       |   |             |                      |                                                              |         |        |  |
|                                                                                 | <i>Agaricostilbum hyphaenes</i>       | 0 | terrestrial | heterorophic species | occurs commonly on palm litter, saprophytic fungi            | present | absent |  |
|                                                                                 | <i>Chionosphaera apobasidialis</i>    | 0 | terrestrial | plant parasites      | parasite of lichens                                          | present | absent |  |
|                                                                                 | <i>Cronartium quercuum</i>            | 0 | terrestrial | plant parasites      | causes plant diseases of pinus                               | present | absent |  |
|                                                                                 | <i>Erythrobasidium hasegawianum</i>   | 0 | terrestrial | heterorophic species | saprophytic fungi                                            | present | absent |  |
|                                                                                 | <i>Heterogastridium pycnidioideum</i> | 0 | terrestrial | animal parasites     | fungi parasites                                              | present | absent |  |
|                                                                                 | <i>Hyalopycnis blepharistoma</i>      | 0 | terrestrial | heterorophic species | saprophytic fungi                                            | present | absent |  |
|                                                                                 | <i>Leucosporidiella creatinivora</i>  | 0 | terrestrial | heterorophic species | saprophytic fungi, isolated from permafrost soil             | present | absent |  |
|                                                                                 | <i>Melampsora laricis</i>             | 0 | terrestrial | plant parasites      | most devastating and widespread pathogen of poplars          | present | absent |  |
|                                                                                 | <i>Meredithblackwellia eburnea</i>    | 0 | terrestrial | heterorophic species | saprophytic fungi                                            | present | absent |  |

|                                                                              |                                     |   |             |                      |                                                                |         |        |    |
|------------------------------------------------------------------------------|-------------------------------------|---|-------------|----------------------|----------------------------------------------------------------|---------|--------|----|
|                                                                              | <i>Mixia osmundae</i>               | 0 | terrestrial | plant parasites      | intracellular parasite of ferns, obligatory plant pathogens    | present | absent |    |
|                                                                              | <i>Naiadella fluitans</i>           | 0 | fresh water | animal parasites     | mycoparasitic                                                  | present | absent |    |
|                                                                              | <i>Naohidea sebacea</i>             | 0 | terrestrial | animal parasites     | mycoparasitic                                                  | present | absent |    |
|                                                                              | <i>Puccinia graminis</i>            | 0 | terrestrial | plant parasites      | causes stem rusts, obligatory plant pathogens                  | present | absent |    |
|                                                                              | <i>Puccinia triticina</i>           | 0 | terrestrial | plant parasites      | causes wheat leaf rust, obligatory plant pathogens             | present | absent |    |
|                                                                              | <i>Rhodospodium toruloides</i>      | 0 | terrestrial | animal parasites     | isolated from wood pulp from conifers, link to bovine mastitis | present | absent |    |
|                                                                              | <i>Rhodotorula graminis</i>         | 0 | terrestrial | animal parasites     | causes infections in animals                                   | present | absent |    |
|                                                                              | <i>Rhodotorula minuta</i>           | 0 | terrestrial | animal parasites     | human parasite                                                 | present | absent |    |
|                                                                              | <i>Septobasidium sp.</i>            | 0 | terrestrial | animal parasites     | entomopathogens                                                | present | absent |    |
|                                                                              | <i>Sporobolomyces pararoseus</i>    | 0 | terrestrial | heterorophic species | saprophytic fungi                                              | present | absent |    |
| <b>Dikarya --&gt; Basidiomycota --&gt; Ustilaginomycotina</b>                |                                     |   |             |                      |                                                                |         |        |    |
|                                                                              | <i>Acaromyces ingoldii</i>          | 0 | terrestrial | heterorophic species | causes mites mortality, saprophytic fungi                      | present | absent |    |
|                                                                              | <i>Ceraceosorus guamensis</i>       | 0 | terrestrial | heterorophic species | saprophytic fungi                                              | present | absent |    |
|                                                                              | <i>Exobasidium vaccinii</i>         | 0 | terrestrial | plant parasites      | plant pathogen that grow on Ericaceae                          | present | absent |    |
|                                                                              | <i>Jaminalia sp.</i>                | 0 | terrestrial | heterorophic species | saprophytic fungi                                              | present | absent |    |
|                                                                              | <i>Malassezia globosa</i>           | 0 | terrestrial | animal parasites     | opportunistic pathogens of humans, causes skin disorders       | present | absent |    |
|                                                                              | <i>Malassezia sympodialis</i>       | 0 | terrestrial | animal parasites     | opportunistic pathogens of humans, causes skin disorders       | present | absent |    |
|                                                                              | <i>Meira mitonrushii</i>            | 0 | terrestrial | heterorophic species | saprophytic fungi, endophyte                                   | present | absent |    |
|                                                                              | <i>Melanotaenium endogenum</i>      | 0 | terrestrial | plant parasites      | Bedstraw smut, pathogen of Galium mollugo                      | present | absent |    |
|                                                                              | <i>Pseudozyma antarctica</i>        | 0 | terrestrial | heterorophic species | saprophytic fungi                                              | present | absent |    |
|                                                                              | <i>Pseudozyma hubeiensis</i>        | 0 | terrestrial | plant parasites      | epiphytic fungus                                               | present | absent |    |
|                                                                              | <i>Sporisorium reilianum</i>        | 0 | terrestrial | plant parasites      | Head Smut pathogen of Sorghum                                  | present | absent |    |
|                                                                              | <i>Testicularia cyperi</i>          | 0 | terrestrial | plant parasites      | colonizes Rhynchospora sp, plant pathogens                     | present | absent |    |
|                                                                              | <i>Tilletiaria anomala</i>          | 0 | terrestrial | heterorophic species | saprophytic fungi - decayed wood                               | present | absent |    |
|                                                                              | <i>Tilletiopsis washingtonensis</i> | 0 | terrestrial | heterorophic species | saprophytic fungi                                              | present | absent |    |
|                                                                              | <i>Ustilago maydis</i>              | 0 | terrestrial | plant parasites      | plant pathogen, causes corn smut                               | present | absent |    |
| <b>Dikarya --&gt; Basidiomycota --&gt; Agaricomycotina --&gt; Agaricales</b> |                                     |   |             |                      |                                                                |         |        |    |
|                                                                              | <i>Agaricus bisporus</i>            | 1 | terrestrial | heterorophic species | portobello mushroom, saprophytic fungi                         | present | yes    |    |
|                                                                              | <i>Amanita muscaria</i>             | 1 | terrestrial | heterorophic species | fly agaric or fly amanita, mycorrhizal                         | present | yes    |    |
|                                                                              | <i>Armillaria mellea</i>            | 1 | terrestrial | plant parasites      | honney fungus, plant pathogen                                  | absent  | yes    | 30 |
|                                                                              | <i>Coprinopsis cinerea</i>          | 1 | terrestrial | heterorophic species | saprophytic fungi, gray shap                                   | present | yes    |    |
|                                                                              | <i>Cortinarius glaucopus</i>        | 0 | terrestrial | plant parasites      | saprophytic fungi, blue-foot webcap, ectomycorrhizal           | present | absent |    |
|                                                                              | <i>Fistulina hepatica</i>           | 1 | terrestrial | plant parasites      | beefsteack fungus, parasitic                                   | present | yes    |    |

|                                                                                  |                                    |   |             |                      |                                                                                  |         |        |  |
|----------------------------------------------------------------------------------|------------------------------------|---|-------------|----------------------|----------------------------------------------------------------------------------|---------|--------|--|
|                                                                                  | <i>Galerina marginata</i>          | 1 | terrestrial | plant parasites      | saprophytic fungi - ectomycorrhizal - produces amatoxins                         | present | yes    |  |
|                                                                                  | <i>Gymnopus luxurians</i>          | 1 | terrestrial | heterorophic species | saprophytic fungi                                                                | present | yes    |  |
|                                                                                  | <i>Hebeloma cylindrosporum</i>     | 1 | terrestrial | plant parasites      | saprophytic fungi - ectomycorrhizal                                              | present | yes    |  |
|                                                                                  | <i>Hypholoma sublateritium</i>     | 1 | terrestrial | heterorophic species | saprophytic fungi, brick cap                                                     | present | yes    |  |
|                                                                                  | <i>Hypsizygus marmoreus</i>        | 1 | terrestrial | heterorophic species | saprophytic fungi                                                                | present | yes    |  |
|                                                                                  | <i>Laccaria amethystina</i>        | 1 | terrestrial | plant parasites      | amethyst deceiver, mycorrhizal                                                   | present | yes    |  |
|                                                                                  | <i>Laccaria bicolor</i>            | 1 | terrestrial | plant parasites      | ectomycorrhizal                                                                  | present | yes    |  |
|                                                                                  | <i>Leucoagaricus gongylophorus</i> | 1 | terrestrial | heterorophic species | saprophytic fungi - associates with ants                                         | present | yes    |  |
|                                                                                  | <i>Panellus stipticus</i>          | 0 | terrestrial | heterorophic species | saprophytic fungi, bitter oyster                                                 | present | absent |  |
|                                                                                  | <i>Pleurotus ostreatus</i>         | 1 | terrestrial | heterorophic species | saprophytic fungi - white -rot wood decay fungus                                 | present | yes    |  |
|                                                                                  | <i>Rhodocollybia butyracea</i>     | 0 | terrestrial | heterorophic species | saprophytic fungi, butterfly collybia                                            | present | absent |  |
|                                                                                  | <i>Schizophyllum commune</i>       | 1 | terrestrial | heterorophic species | saprophytic fungi                                                                | present | yes    |  |
|                                                                                  | <i>Termitomyces sp. J132</i>       | 1 | terrestrial | heterorophic species | saprophytic fungi - food source for termites                                     | present | no     |  |
| <b>Dikarya --&gt; Basidiomycota --&gt; Agaricomycotina --&gt; Atheliales</b>     |                                    |   |             |                      |                                                                                  |         |        |  |
|                                                                                  | <i>Piloderma croceum</i>           | 1 | terrestrial | plant parasites      | ectomycorrhizal                                                                  | present | yes    |  |
| <b>Dikarya --&gt; Basidiomycota --&gt; Agaricomycotina --&gt; Auriculariales</b> |                                    |   |             |                      |                                                                                  |         |        |  |
|                                                                                  | <i>Auricularia subglabra</i>       | 1 | terrestrial | heterorophic species | saprophytic fungi, produce a white rot on dead wood                              | present | yes    |  |
| <b>Dikarya --&gt; Basidiomycota --&gt; Agaricomycotina --&gt; Polyporales</b>    |                                    |   |             |                      |                                                                                  |         |        |  |
|                                                                                  | <i>Bjerkandera adusta</i>          | 1 | terrestrial | plant parasites      | saprophytic fungi, smoky polypore, plant pathogen, cause white rot in live trees | present | yes    |  |
|                                                                                  | <i>Ceriporiopsis subvermispora</i> | 1 | terrestrial | heterorophic species | saprophytic fungi, crust fungi that cause a white rot                            | present | yes    |  |
|                                                                                  | <i>Daedalea quercina</i>           | 1 | terrestrial | heterorophic species | saprophytic fungi, oak mazelgill, causes brown rot                               | present | yes    |  |
|                                                                                  | <i>Dichomitus squalens</i>         | 1 | terrestrial | heterorophic species | saprophytic fungi                                                                | present | yes    |  |
|                                                                                  | <i>Exidia glandulosa</i>           | 1 | terrestrial | heterorophic species | black jelly roll, saprophytic fungi                                              | present | yes    |  |
|                                                                                  | <i>Fibroporia radiculosa</i>       | 0 | terrestrial | heterorophic species | saprophytic fungi - brown rot fungus                                             | present | absent |  |
|                                                                                  | <i>Fibulorhizoctonia sp.</i>       | 0 | terrestrial | heterorophic species | cuckoo fungus, saprophytic fungi, use by termite                                 | present | absent |  |
|                                                                                  | <i>Fomitopsis pinicola</i>         | 1 | terrestrial | heterorophic species | stem decay fungus, red belt conk, saprophytic fungi                              | present | yes    |  |
|                                                                                  | <i>Ganoderma lucidum</i>           | 1 | terrestrial | heterorophic species | saprophytic fungi, grow on both coniferous and hardwood species                  | present | yes    |  |
|                                                                                  | <i>Gelatoporia subvermispora</i>   | 1 | terrestrial | heterorophic species | saprophytic fungi                                                                | present | yes    |  |
|                                                                                  | <i>Laetiporus sulphureus</i>       | 1 | terrestrial | heterorophic species | sulphur polypore, saprophytic fungi                                              | present | yes    |  |
|                                                                                  | <i>Lentinus tigrinus</i>           | 1 | terrestrial | heterorophic species | saprophytic fungi                                                                | present | yes    |  |
|                                                                                  | <i>Phanerochaete carmosa</i>       | 1 | terrestrial | plant parasites      | plant pathogen that infects plane trees                                          | present | yes    |  |
|                                                                                  | <i>Phlebiopsis gigantea</i>        | 1 | terrestrial | heterorophic species | saprophytic fungi, causes white rot on conifer                                   | present | yes    |  |



|                                                                                   |                                    |   |             |                      |                                                                                          |         |        |  |
|-----------------------------------------------------------------------------------|------------------------------------|---|-------------|----------------------|------------------------------------------------------------------------------------------|---------|--------|--|
|                                                                                   | <i>Heterobasidion irregulare</i>   | 1 | terrestrial | plant parasites      | tree root rotting pathogenic fungus                                                      | present | yes    |  |
|                                                                                   | <i>Peniophora sp.</i>              | 1 | terrestrial | plant parasites      | plant pathogens                                                                          | present | yes    |  |
|                                                                                   | <i>Stereum hirsutum</i>            | 1 | terrestrial | plant parasites      | false turkey tail, plant pathogen infecting peach trees                                  | present | yes    |  |
| <b>Dikarya --&gt; Basidiomycota --&gt; Agaricomycotina --&gt; Jaapiales</b>       |                                    |   |             |                      |                                                                                          |         |        |  |
|                                                                                   | <i>Jaapia argillacea</i>           | 2 | terrestrial | heterorophic species | saprophytic fungi, produces a type of brown rot                                          | present | yes    |  |
| <b>Dikarya --&gt; Basidiomycota --&gt; Agaricomycotina --&gt; Gomphales</b>       |                                    |   |             |                      |                                                                                          |         |        |  |
|                                                                                   | <i>Ramaria rubella</i>             | 1 | terrestrial | plant parasites      | mycorrhizal, red coral                                                                   | present | yes    |  |
| <b>Dikarya --&gt; Basidiomycota --&gt; Agaricomycotina --&gt; Geastrales</b>      |                                    |   |             |                      |                                                                                          |         |        |  |
|                                                                                   | <i>Sphaerobolus stellatus</i>      | 1 | terrestrial | heterorophic species | saprophytic fungi, shotgun or cannonball fungus                                          | present | yes    |  |
| <b>Dikarya --&gt; Basidiomycota --&gt; Agaricomycotina --&gt; Tremellomycetes</b> |                                    |   |             |                      |                                                                                          |         |        |  |
|                                                                                   | <i>Cryptococcus gattii</i>         | 0 | terrestrial | animal parasites     | cause cryptococcosis                                                                     | present | absent |  |
|                                                                                   | <i>Cryptococcus neoformans</i>     | 0 | terrestrial | animal parasites     | cause cryptococcosis                                                                     | present | absent |  |
|                                                                                   | <i>Dioszegia cryoxerica</i>        | 0 | terrestrial | heterorophic species | psychrophilic yeasts from polar desert soils                                             | present | absent |  |
|                                                                                   | <i>Fellomyces penicillatus</i>     | 0 | terrestrial | heterorophic species | saprophytic fungi                                                                        | present | absent |  |
|                                                                                   | <i>Fibulobasidium inconspicuum</i> | 0 | terrestrial | heterorophic species | saprophytic fungi                                                                        | present | absent |  |
|                                                                                   | <i>Sistotremastrum suecicum</i>    | 0 | terrestrial | heterorophic species | saprophytic fungi, cause a brown rot of various tree species                             | present | absent |  |
|                                                                                   | <i>Tremella enphala</i>            | 0 | terrestrial | animal parasites     | parasitic on another species of fungus                                                   | present | absent |  |
|                                                                                   | <i>Tremella mesenterica</i>        | 0 | terrestrial | animal parasites     | yellow brain, parasite of wood decay fungi                                               | present | absent |  |
|                                                                                   | <i>Trichosporon oleaginosus</i>    | 0 | terrestrial | heterorophic species | saprophytic fungi                                                                        | present | absent |  |
| <b>Dikarya --&gt; Basidiomycota --&gt; Agaricomycotina --&gt; Cantharellales</b>  |                                    |   |             |                      |                                                                                          |         |        |  |
|                                                                                   | <i>Botryobasidium botryosum</i>    | 0 | terrestrial | heterorophic species | saprophytic fungis                                                                       | present | absent |  |
|                                                                                   | <i>Cantharellus anzutake</i>       | 0 | terrestrial | plant parasites      | golden chanterelle, ectomycorrhizal                                                      | present | absent |  |
|                                                                                   | <i>Clavulina sp.</i>               | 0 | terrestrial | plant parasites      | saprophytic fungis - ectomycorrhizal                                                     | present | absent |  |
|                                                                                   | <i>Hydnum rufescens</i>            | 0 | terrestrial | plant parasites      | symbiotic fungi identified in orchids                                                    | present | absent |  |
|                                                                                   | <i>Rhizoctonia solani</i>          | 1 | terrestrial | plant parasites      | plant pathogenus fungi, causes collar and root rot                                       | present | yes    |  |
|                                                                                   | <i>Tulasnella calospora</i>        | 0 | terrestrial | plant parasites      | mychorhizien                                                                             | present | absent |  |
| <b>Dikarya --&gt; Basidiomycota --&gt; Agaricomycotina --&gt; Wallemiomycetes</b> |                                    |   |             |                      |                                                                                          |         |        |  |
|                                                                                   | <i>Wallemia ichthyophaga</i>       | 0 | terrestrial | heterorophic species | halophilic - saprophytic fungi                                                           | present | absent |  |
|                                                                                   | <i>Wallemia sebi</i>               | 0 | terrestrial | heterorophic species | xerophilic - saprophytic fungi                                                           | present | absent |  |
| <b>Dikarya --&gt; Basidiomycota --&gt; Agaricomycotina --&gt; Dacrymycetales</b>  |                                    |   |             |                      |                                                                                          |         |        |  |
|                                                                                   | <i>Calocera cornea</i>             | 0 | terrestrial | heterorophic species | saprophytic fungi - grows on decaying wood                                               | present | absent |  |
|                                                                                   | <i>Calocera viscosa</i>            | 0 | terrestrial | heterorophic species | saprophytic fungi - yellow stagshorn                                                     | present | absent |  |
|                                                                                   | <i>Dacryopinax primogenitus</i>    | 0 | terrestrial | heterorophic species | saprophytic fungi - causes extensive decay in dead wood                                  | present | absent |  |
| <b>Dikarya --&gt; Ascomycota --&gt; Pezizomycotina --&gt; Pezizomycetes</b>       |                                    |   |             |                      |                                                                                          |         |        |  |
|                                                                                   | <i>Ascobolus immersus</i>          | 0 | terrestrial | heterorophic species | coprophilous                                                                             | present | absent |  |
|                                                                                   | <i>Ascodesmis nigricans</i>        | 0 | terrestrial | heterorophic species | coprophilous                                                                             | present | absent |  |
|                                                                                   | <i>Caloscypha fulgens</i>          | 0 | terrestrial | plant parasites      | saprophytic fungi - infect dormant seeds of Picea sitchensis - spring orange peel fungus | present | absent |  |



|                                                                              |                                      |   |             |                      |                                                                             |         |        |  |
|------------------------------------------------------------------------------|--------------------------------------|---|-------------|----------------------|-----------------------------------------------------------------------------|---------|--------|--|
|                                                                              | <i>Choiromyces venosus</i>           | 0 | terrestrial | plant parasites      | ectomycorrhizal - pig truffle                                               | present | absent |  |
|                                                                              | <i>Gyromitra esculenta</i>           | 0 | terrestrial | heterorophic species | saprophytic fungi                                                           | present | absent |  |
|                                                                              | <i>Kalaharituber pfeilii</i>         | 0 | terrestrial | plant parasites      | saprophytic fungi - ectomycorrhizal                                         | present | absent |  |
|                                                                              | <i>Morchella importuna</i>           | 0 | terrestrial | heterorophic species | saprophytic fungi                                                           | present | absent |  |
|                                                                              | <i>Plectania melastoma</i>           | 0 | terrestrial | heterorophic species | saprophytic fungi (neither mycorrhizal nor edible)                          | present | absent |  |
|                                                                              | <i>Pyronema confluens</i>            | 0 | terrestrial | heterorophic species | saprophytic fungi                                                           | present | absent |  |
|                                                                              | <i>Sarcoscypha coccinea</i>          | 0 | terrestrial | heterorophic species | saprophytic fungi - scarlet elf cup                                         | present | absent |  |
|                                                                              | <i>Terfezia boudieri</i>             | 0 | terrestrial | plant parasites      | saprophytic fungi - ectomycorrhizal - desert truffle                        | present | absent |  |
|                                                                              | <i>Tuber melanosporum</i>            | 0 | terrestrial | plant parasites      | saprophytic fungi - ectomycorrhizal- black truffle                          | present | absent |  |
|                                                                              | <i>Wilcoxina mikolae</i>             | 0 | terrestrial | plant parasites      | ectomycorrhizal                                                             | present | absent |  |
| <b>Dikarya --&gt; Ascomycota --&gt; Pezizomycotina --&gt; Orbiliomycetes</b> |                                      |   |             |                      |                                                                             |         |        |  |
|                                                                              | <i>Arthrobotrys oligospora</i>       | 0 | terrestrial | heterorophic species | carnivorous fungus (nematode-trapping)                                      | present | absent |  |
|                                                                              | <i>Dactyloellina haptotyla</i>       | 0 | terrestrial | heterorophic species | carnivorous fungus (nematode-trapping)                                      | present | absent |  |
|                                                                              | <i>Monacrosporium haptotylum</i>     | 0 | terrestrial | heterorophic species | carnivorous fungus (nematode-trapping)                                      | present | absent |  |
| <b>Dikarya --&gt; Ascomycota --&gt; Pezizomycotina --&gt; Eurotiomycetes</b> |                                      |   |             |                      |                                                                             |         |        |  |
|                                                                              | <i>Ajellomyces capsulatus</i>        | 1 | terrestrial | animal parasites     | cause histoplasmosis                                                        | present | yes    |  |
|                                                                              | <i>Ajellomyces dermatitidis</i>      | 1 | terrestrial | animal parasites     | cause histoplasmosis                                                        | present | yes    |  |
|                                                                              | <i>Arthroderma otae</i>              | 0 | terrestrial | animal parasites     | anthropophilic saprotrop, colonizes the dead skin, fungal infection of nail | present | absent |  |
|                                                                              | <i>Aspergillus sp.</i>               | 0 | terrestrial | heterorophic species | saprophytic fungi                                                           | present | absent |  |
|                                                                              | <i>Aspergillus sydowii</i>           | 0 | terrestrial | animal parasites     | cause of aspergillosis in sea fan corals                                    | present | absent |  |
|                                                                              | <i>Blastomyces gilchristii</i>       | 1 | terrestrial | animal parasites     | human parasites, causes blastomycosis                                       | present | yes    |  |
|                                                                              | <i>Emmonsia crescens</i>             | 1 | terrestrial | animal parasites     | causes adiaspiromycosis                                                     | present | yes    |  |
|                                                                              | <i>Emmonsia parva</i>                | 1 | terrestrial | animal parasites     | causes adiaspiromycosis                                                     | present | yes    |  |
|                                                                              | <i>Eurotium rubrum</i>               | 0 | terrestrial | heterorophic species | saprophytic fungi - live in Dead Sea water                                  | present | absent |  |
|                                                                              | <i>Gymnascella aurantiaca</i>        | 0 | terrestrial | heterorophic species | saprophytic fungi                                                           | present | absent |  |
|                                                                              | <i>Gymnascella citrina</i>           | 0 | terrestrial | heterorophic species | saprophytic fungi                                                           | present | absent |  |
|                                                                              | <i>Histoplasma capsulatum</i>        | 1 | terrestrial | animal parasites     | causes histoplasmosis - opportunist human pathogen                          | present | yes    |  |
|                                                                              | <i>Monascus ruber</i>                | 0 | terrestrial | heterorophic species | corn silage mold                                                            | present | absent |  |
|                                                                              | <i>Paracoccidioides brasiliensis</i> | 1 | terrestrial | animal parasites     | causes paracoccidioidomycosis                                               | present | yes    |  |
|                                                                              | <i>Paracoccidioides lutzii</i>       | 1 | terrestrial | animal parasites     | causes paracoccidioidomycosis                                               | present | yes    |  |
|                                                                              | <i>Penicillium oxalicum</i>          | 0 | terrestrial | heterorophic species | saprophytic fungi                                                           | present | absent |  |
|                                                                              | <i>Talaromyces marneffei</i>         | 0 | terrestrial | animal parasites     | opportunistic human pathogen                                                | present | absent |  |
|                                                                              | <i>Thermoascus aurantiacus</i>       | 0 | terrestrial | heterorophic species | thermophilic fungus, saprophytic fungi                                      | present | absent |  |

|                                                                               |                                   |   |             |                      |                                                                             |         |        |        |
|-------------------------------------------------------------------------------|-----------------------------------|---|-------------|----------------------|-----------------------------------------------------------------------------|---------|--------|--------|
|                                                                               | <i>Trichophyton rubrum</i>        | 0 | terrestrial | animal parasites     | anthropophilic saprotrop, colonizes the dead skin, fungal infection of nail | present | absent |        |
| <b>Dikarya --&gt; Ascomycota --&gt; Pezizomycotina --&gt; Dothideomycetes</b> |                                   |   |             |                      |                                                                             |         |        |        |
|                                                                               | <i>Acidomyces richmondensis</i>   | 0 | terrestrial | heterorophic species | acidophilic filamentous fungi                                               | present | absent |        |
|                                                                               | <i>Ascochyta</i>                  | 0 | terrestrial | plant parasites      | pathogens of plants (particularly cereal crops)                             | present | absent |        |
|                                                                               | <i>Aureobasidium pullulans</i>    | 0 | terrestrial | plant parasites      | epiphyte, endophyte, pathogen opportunist of humans                         | present | absent |        |
|                                                                               | <i>Bipolaris oryzae</i>           | 0 | terrestrial | plant parasites      | causes brown spot disease in rice                                           | present | absent |        |
|                                                                               | <i>Dothistroma septosporum</i>    | 0 | terrestrial | plant parasites      | causes red band needle blight                                               | present | absent |        |
|                                                                               | <i>Leptosphaeria maculans</i>     | 0 | terrestrial | plant parasites      | causal agent of blackleg disease                                            | present | absent |        |
|                                                                               | <i>Macrophomina phaseolina</i>    | 0 | terrestrial | plant parasites      | causes damping off, seedling blight and collar rot                          | present | absent |        |
|                                                                               | <i>Neofusicoccum parvum</i>       | 0 | terrestrial | plant parasites      | causing serious damage to Eucalyptus                                        | present | absent |        |
|                                                                               | <i>Parastagonospora nodorum</i>   | 0 | terrestrial | plant parasites      | major fungal pathogen of wheat                                              | absent  | absent | 15.973 |
|                                                                               | <i>Pseudocercospora fijiensis</i> | 0 | terrestrial | plant parasites      | plant pathogens                                                             | present | absent |        |
|                                                                               | <i>Verruconis gallopava</i>       | 0 | terrestrial | animal parasites     | Human parasitic phaeohyphomycosis                                           | present | absent |        |
|                                                                               | <i>Zymoseptoria brevis</i>        | 1 | terrestrial | plant parasites      | causes septoria leaf blotch                                                 | present | no     |        |
| <b>Dikarya --&gt; Ascomycota --&gt; Pezizomycotina --&gt; Lecanoromycetes</b> |                                   |   |             |                      |                                                                             |         |        |        |
|                                                                               | <i>Xanthoria parietina</i>        | 0 | terrestrial | heterorophic species | lichens                                                                     | present | absent |        |
| <b>Dikarya --&gt; Ascomycota --&gt; Pezizomycotina --&gt; Leotiomyces</b>     |                                   |   |             |                      |                                                                             |         |        |        |
|                                                                               | <i>Acephala macrosclerotium</i>   | 0 | terrestrial | heterorophic species | saprophytic fungi - forms ectomycorrhizas on Pinus sylvestris               | present | absent |        |
|                                                                               | <i>Amorphotheca resinae</i>       | 0 | terrestrial | heterorophic species | saprophytic fungi - can live in tanks of diesel                             | present | absent |        |
|                                                                               | <i>Blumeria graminis</i>          | 0 | terrestrial | plant parasites      | causes barley powdery mildew on grasses including cereals                   | present | absent |        |
|                                                                               | <i>Botrytis cinerea</i>           | 0 | terrestrial | plant parasites      | necrotrophic fungus, botrytis bunch rot                                     | present | absent |        |
|                                                                               | <i>Bulgaria inquinans</i>         | 0 | terrestrial | heterorophic species | saprophytic fungi - black bulgar                                            | present | absent |        |
|                                                                               | <i>Cadophora malorum</i>          | 0 | terrestrial | plant parasites      | plant pathogen, causes side rot in apple and pear                           | present | absent |        |
|                                                                               | <i>Chalara longipes</i>           | 0 | terrestrial | heterorophic species | saprophytic fungi                                                           | present | absent |        |
|                                                                               | <i>Coccomyces strobili</i>        | 0 | terrestrial | plant parasites      | plant pathogen - causes Cherry leaf spot                                    | present | absent |        |
|                                                                               | <i>Erysiphe necator</i>           | 0 | terrestrial | plant parasites      | causes powdery mildew of grape                                              | present | absent |        |
|                                                                               | <i>Leptodontium sp.</i>           | 0 | terrestrial | heterorophic species | saprophytic fungi - responsible for Sooty Blotch disease                    | present | absent |        |
|                                                                               | <i>Loramycetes juncicola</i>      | 0 | terrestrial | heterorophic species | saprophytic fungi                                                           | present | absent |        |
|                                                                               | <i>Loramycetes macrosporus</i>    | 0 | terrestrial | heterorophic species | saprophytic fungi                                                           | present | absent |        |
|                                                                               | <i>Meliniomyces bicolor</i>       | 0 | terrestrial | plant parasites      | saprophytic fungi - ectomycorrhizal - root-associated fungi                 | present | absent |        |
|                                                                               | <i>Meliniomyces variabilis</i>    | 0 | terrestrial | plant parasites      | saprophytic fungi - ectomycorrhizal - root-associated fungi                 | present | absent |        |
|                                                                               | <i>Oidiodendron maius</i>         | 0 | terrestrial | heterorophic species | mycorrhizal fungus                                                          | present | absent |        |

|                                                                               |                                  |   |             |                      |                                                                                         |         |        |       |
|-------------------------------------------------------------------------------|----------------------------------|---|-------------|----------------------|-----------------------------------------------------------------------------------------|---------|--------|-------|
|                                                                               | <i>Phialocephala scopiformis</i> | 0 | terrestrial | plant parasites      | endophyte                                                                               | present | absent |       |
|                                                                               | <i>Rhizoscyphus ericae</i>       | 0 | terrestrial | plant parasites      | mycorrhizal fungus                                                                      | present | absent |       |
|                                                                               | <i>Rutstroemia firma</i>         | 0 | terrestrial | heterorophic species | saprophytic fungi - grows on wood                                                       | present | absent |       |
|                                                                               | <i>Sclerotinia borealis</i>      | 0 | terrestrial | plant parasites      | cause a plant pathogen infecting barley                                                 | present | absent |       |
|                                                                               | <i>Sclerotinia sclerotiorum</i>  | 0 | terrestrial | plant parasites      | cause a disease called white mold                                                       | present | absent |       |
|                                                                               | <i>Sporothrix insectorum</i>     | 1 | terrestrial | heterorophic species | decomposing plant material and pathogen opportunist (causative agent of sporotrichosis) | present | yes    |       |
|                                                                               | <i>Thelebolus microsporus</i>    | 0 | terrestrial | heterorophic species | saprobic fungus                                                                         | present | absent |       |
| <b>Dikarya --&gt; Ascomycota --&gt; Pezizomycotina --&gt; Sordariomycetes</b> |                                  |   |             |                      |                                                                                         |         |        |       |
|                                                                               | <i>Acremonium alcalophilum</i>   | 0 | terrestrial | heterorophic species | saprophytic fungi                                                                       | present | absent |       |
|                                                                               | <i>Anthostoma avocetta</i>       | 0 | terrestrial | heterorophic species | saprophytic fungi                                                                       | present | absent |       |
|                                                                               | <i>Apiospora montagnei</i>       | 0 | terrestrial | plant parasites      | causes kernel blight on barley                                                          | present | absent |       |
|                                                                               | <i>Ceratocystis sp.</i>          | 0 | terrestrial | plant parasites      | plant pathogens, causing diseases such as oak wilt and pineapple black rot              | absent  | absent | 3.432 |
|                                                                               | <i>Clonostachys rosea</i>        | 0 | terrestrial | animal parasites     | endophyte, saprophytic fungi, parasite of other fungi and of nematodes                  | present | absent |       |
|                                                                               | <i>Colletotrichum caudatum</i>   | 0 | terrestrial | plant parasites      | phytopathogens                                                                          | present | absent |       |
|                                                                               | <i>Colletotrichum zoysiae</i>    | 0 | terrestrial | plant parasites      | most common and destructive of plant pathogenic fungi                                   | present | absent |       |
|                                                                               | <i>Coniochaeta sp.</i>           | 0 | terrestrial | plant parasites      | saprotrophs, endophytes and pathogens of trees                                          | present | absent |       |
|                                                                               | <i>Corollospora maritima</i>     | 0 | marine      | heterorophic species | saprophytic fungi                                                                       | present | absent |       |
|                                                                               | <i>Cryphonectria parasitica</i>  | 0 | terrestrial | plant parasites      | causes chestnut blight                                                                  | present | absent |       |
|                                                                               | <i>Daldinia eschscholzii</i>     | 0 | terrestrial | heterorophic species | saprotrophic                                                                            | present | absent |       |
|                                                                               | <i>Drechmeria coniospora</i>     | 0 | terrestrial | animal parasites     | entomopathons                                                                           | absent  | absent | 0     |
|                                                                               | <i>Fusarium sp.</i>              | 0 | terrestrial | heterorophic species | saprophytic fungus - produces mycotoxins in cereal crops                                | present | absent |       |
|                                                                               | <i>Glomerella graminicola</i>    | 0 | terrestrial | plant parasites      | causes anthracnose in many cereal                                                       | present | absent |       |
|                                                                               | <i>Hypoxyylon sp.</i>            | 0 | terrestrial | heterorophic species | saprophytic fungi, found on dead wood                                                   | present | absent |       |
|                                                                               | <i>Ilyonectria sp.</i>           | 0 | terrestrial | plant parasites      | symptoms of root rot on herbaceous plants                                               | present | absent |       |
|                                                                               | <i>Lindra thalassiae</i>         | 0 | marine      | plant parasites      | parasites of various sea grasses                                                        | present | absent |       |
|                                                                               | <i>Lolipopaia minuta</i>         | 0 | terrestrial | heterorophic species | saprophytic fungi                                                                       | present | absent |       |
|                                                                               | <i>Magnaporthe oryzae</i>        | 0 | terrestrial | plant parasites      | also known as rice blast fungus, rice rotten neck                                       | present | absent |       |
|                                                                               | <i>Melanconium juglandinum</i>   | 0 | terrestrial | plant parasites      | plant pathogen                                                                          | present | absent |       |
|                                                                               | <i>Melanospora tiffanyae</i>     | 0 | terrestrial | animal parasites     | mycoparasitic fungus                                                                    | present | absent |       |
|                                                                               | <i>Microascus trigonosporus</i>  | 0 | terrestrial | animal parasites     | saprotrophic, opportunistic human pathogen                                              | present | absent |       |

[illegible]

|                              |                                       |   |             |                      |                                                                                                       |         |        |   |
|------------------------------|---------------------------------------|---|-------------|----------------------|-------------------------------------------------------------------------------------------------------|---------|--------|---|
|                              | <i>Rhizophagus irregularis</i>        | 1 | terrestrial | plant parasites      | mycorrhizal fungus                                                                                    | present | yes    |   |
| <b>Mortierellomycotina</b>   |                                       |   |             |                      |                                                                                                       |         |        |   |
|                              | <i>Mortierella</i> sp.                | 0 | terrestrial | heterorophic species | saprotrophs in soil                                                                                   | present | absent |   |
| <b>Mucoromycotina</b>        |                                       |   |             |                      |                                                                                                       |         |        |   |
|                              | <i>Absidia glauca</i>                 | 1 | terrestrial | animal parasites     | causes zygomycosis and mucormycosis                                                                   | absent  | yes    | 3 |
|                              | <i>Absidia repens</i>                 | 1 | terrestrial | animal parasites     | causes zygomycosis and mucormycosis                                                                   | present | yes    |   |
|                              | <i>Backusella circina</i>             | 0 | terrestrial | heterorophic species | thermophilic fungus                                                                                   | present | absent |   |
|                              | <i>Blakeslea trispora</i>             | 1 | terrestrial | plant parasites      | pathogen autotrophic species, source of beta carotene                                                 | present | yes    |   |
|                              | <i>Hesseltinella vesiculosa</i>       | 0 | terrestrial | plant parasites      | saprophytic fungus or facultative plant parasites or facultative pathogens of humans (mucoromycotina) | present | absent |   |
|                              | <i>Lichtheimia corymbifera</i>        | 1 | terrestrial | animal parasites     | saprotrophic mold and opportunistic animals pathogen                                                  | present | yes    |   |
|                              | <i>Lichtheimia ramosa</i>             | 1 | terrestrial | animal parasites     | saprotrophic mold and opportunistic animals pathogen                                                  | absent  | yes    | 0 |
|                              | <i>Mucor ambiguus</i>                 | 1 | terrestrial | plant parasites      | plant pathogen                                                                                        | absent  | yes    | 0 |
|                              | <i>Mucor circinelloides</i>           | 1 | terrestrial | plant parasites      | plant pathogen                                                                                        | present | yes    |   |
|                              | <i>Parasitella parasitica</i>         | 1 | terrestrial | animal parasites     | mycoparasite                                                                                          | present | yes    |   |
|                              | <i>Phycomyces blakesleeanus</i>       | 1 | terrestrial | heterorophic species | saprophytic fungi                                                                                     | present | yes    |   |
|                              | <i>Rhizopus deleamar</i>              | 1 | terrestrial | plant parasites      | infecting carrots, pineapples, ...                                                                    | present | yes    |   |
|                              | <i>Rhizopus microsporus</i>           | 1 | terrestrial | plant parasites      | infecting maize, sunflower, ...                                                                       | present | yes    |   |
|                              | <i>Syncephalastrum racemosum</i>      | 1 | terrestrial | heterorophic species | nopathogenic organism, common species in soil                                                         | present | yes    |   |
|                              | <i>Thamnidium elegans</i>             | 0 | terrestrial | animal parasites     | saprophytic fungi mucuromycete                                                                        | present | absent |   |
|                              | <i>Umbelopsis ramanniana</i>          | 1 | terrestrial | plant parasites      | cosmopolitan saprotrop and endophyte of healthy and declining conifers                                | present | yes    |   |
| <b>Entomophthoromycotina</b> |                                       |   |             |                      |                                                                                                       |         |        |   |
|                              | <i>Basidiobolus meristosporus</i>     | 1 | terrestrial | animal parasites     | human pathogens - commensal in frogs                                                                  | present | no     |   |
| <b>Blastocladiomycota</b>    |                                       |   |             |                      |                                                                                                       |         |        |   |
|                              | <i>Allomyces magrogynus</i>           | 0 | terrestrial | heterorophic species | -                                                                                                     | present | absent |   |
|                              | <i>Catenaria anguillulae</i>          | 0 | terrestrial | animal parasites     | facultative parasite of nematode parasites                                                            | present | absent |   |
| <b>Chytridiomycota</b>       |                                       |   |             |                      |                                                                                                       |         |        |   |
|                              | <i>Batrachochytrium dendrobatidis</i> | 0 | terrestrial | animal parasites     | amphibian chytrid fungus                                                                              | present | absent |   |
|                              | <i>Gonapodya prolifera</i>            | 1 | fresh-water | heterorophic species | carnivorous                                                                                           | present | no     |   |
|                              | <i>Spizellomyces punctatus</i>        | 0 | terrestrial | animal parasites     | parasites of organisms that attack nematodes                                                          | present | absent |   |
| <b>Neocallimastigomycota</b> |                                       |   |             |                      |                                                                                                       |         |        |   |
|                              | <i>Piromyces finnis</i>               | 1 | terrestrial | heterorophic species | obligate anaerobes                                                                                    | present | yes    |   |
| <b>Microsporidia</b>         |                                       |   |             |                      |                                                                                                       |         |        |   |
|                              | <i>Anncaliia algerae</i>              | 0 | fresh-water | animal parasites     | infects mosquitoes                                                                                    | present | absent |   |
|                              | <i>Anncaliia algerae</i>              | 0 | terrestrial | animal parasites     | infects mosquitoes                                                                                    | present | absent |   |
|                              | <i>Antonospora locustae</i>           | 0 | terrestrial | animal parasites     | obligate intracellular parasites                                                                      | present | absent |   |
|                              | <i>Encephalitozoon intestinalis</i>   | 0 | terrestrial | animal parasites     | cause microsporidiosis                                                                                | present | absent |   |
|                              | <i>Encephalitozoon romaleae</i>       | 0 | terrestrial | animal parasites     | obligate intracellular parasites                                                                      | present | absent |   |

|                                                                                              |                                      |   |             |                      |                                                |         |        |        |
|----------------------------------------------------------------------------------------------|--------------------------------------|---|-------------|----------------------|------------------------------------------------|---------|--------|--------|
|                                                                                              | <i>Nematocida parisi</i>             | 0 | terrestrial | animal parasites     | nematode-killer from Paris                     | present | absent |        |
|                                                                                              | <i>Nosema ceranae</i>                | 0 | terrestrial | animal parasites     | parasite of Apis cerana, the Asiatic honey bee | present | absent |        |
|                                                                                              | <i>Ordospora colligata</i>           | 0 | terrestrial | animal parasites     | obligatory intracellular parasite              | absent  | absent | 0      |
| <b>Cryptomycota</b>                                                                          |                                      |   |             |                      |                                                |         |        |        |
|                                                                                              | <i>Rozella allomyces</i>             | 0 | terrestrial | animal parasites     | obligate endoparasite of the water mold        | present | absent |        |
| <b>Opisthokonts --&gt; Metazoa --&gt; Diploblasta --&gt; Placozoa</b>                        |                                      |   |             |                      |                                                |         |        |        |
|                                                                                              | <i>Trichoplax adhaerens</i>          | 2 | terrestrial | heterorophic species | very flat organisms                            | present | yes    |        |
| <b>Diploblasta --&gt; Porifera</b>                                                           |                                      |   |             |                      |                                                |         |        |        |
|                                                                                              | <i>Amphimedon queenslandica</i>      | 0 | marine      | heterorophic species | sponge                                         | present | absent |        |
| <b>Diploblasta --&gt; Ctenophora</b>                                                         |                                      |   |             |                      |                                                |         |        |        |
|                                                                                              | <i>Mnemiopsis leidyi</i>             | 1 | marine      | heterorophic species | warty comb jelly or sea walnut                 | present | yes    |        |
| <b>Diploblasta --&gt; Cnidaria</b>                                                           |                                      |   |             |                      |                                                |         |        |        |
|                                                                                              | <i>Hydra magnipapillata</i>          | 1 | fresh water | heterorophic species | hydra                                          | present | yes    |        |
|                                                                                              | <i>Nematostella vectensis</i>        | 1 | marine      | heterorophic species | Starlet sea anemone                            | present | yes    |        |
| <b>Opisthokonts --&gt; Metazoa --&gt; Bilateria --&gt; Deuterostomia --&gt; Hemichordata</b> |                                      |   |             |                      |                                                |         |        |        |
|                                                                                              | <i>Saccaglossus kowalevskii</i>      | 1 | marine      | heterorophic species | Acorn worm                                     | present | yes    |        |
| <b>Bilateria --&gt; Deuterostomia --&gt; Echinodermata</b>                                   |                                      |   |             |                      |                                                |         |        |        |
|                                                                                              | <i>Paracentrotus lividus</i>         | 1 | marine      | heterorophic species | Sea urchin                                     | absent  | yes    | 141217 |
|                                                                                              | <i>Patiria miniata</i>               | 1 | marine      | heterorophic species | Blue bat star                                  | present | yes    |        |
|                                                                                              | <i>Strongylocentrotus purpuratus</i> | 2 | marine      | heterorophic species | Sea urchin                                     | present | yes    |        |
| <b>Bilateria --&gt; Deuterostomia --&gt; Chordata</b>                                        |                                      |   |             |                      |                                                |         |        |        |
| <b>Urochordates</b>                                                                          |                                      |   |             |                      |                                                |         |        |        |
|                                                                                              | <i>Ciona intestinalis</i>            | 2 | marine      | heterorophic species | Vase tunicate                                  | present | yes    |        |
| <b>Cephalochordates</b>                                                                      |                                      |   |             |                      |                                                |         |        |        |
|                                                                                              | <i>Branchiostoma floridae</i>        | 1 | marine      | heterorophic species | Florida lancelet                               | present | yes    |        |
| <b>Cyclostomes</b>                                                                           |                                      |   |             |                      |                                                |         |        |        |
|                                                                                              | <i>Myxine glutinosa</i>              | 1 | marine      | heterorophic species | Atlantic hagfish                               | present | yes    |        |
|                                                                                              | <i>Petromyzon marinus</i>            | 1 | marine      | heterorophic species | Sea lamprey                                    | present | yes    |        |
| <b>Cartilaginous fish</b>                                                                    |                                      |   |             |                      |                                                |         |        |        |
|                                                                                              | <i>Callorhynchus milli</i>           | 2 | marine      | heterorophic species | Australian ghostshark                          | present | yes    |        |
| <b>Bony fish</b>                                                                             |                                      |   |             |                      |                                                |         |        |        |
|                                                                                              | <i>Cyprinus carpio</i>               | 2 | marine      | heterorophic species | Common carp                                    | present | yes    |        |
|                                                                                              | <i>Dicentrarchus labrax</i>          | 1 | marine      | heterorophic species | European bass                                  | present | yes    |        |
|                                                                                              | <i>Fundulus heteroclitus</i>         | 2 | marine      | heterorophic species | Mummichog                                      | present | yes    |        |
|                                                                                              | <i>Haplochromis chilotes</i>         | 1 | fresh-water | heterorophic species | cichlid (fish)                                 | absent  | no     | 35763  |
|                                                                                              | <i>Osmerus mordax</i>                | 2 | marine      | heterorophic species | Rainbow smelt                                  | present | yes    |        |
|                                                                                              | <i>Salmo salar</i>                   | 2 | marine      | heterorophic species | Atlantic salmon                                | present | yes    |        |
|                                                                                              | <i>Takifugu rubripes</i>             | 2 | marine      | heterorophic species | Japanese puffer                                | present | yes    |        |
|                                                                                              | <i>Xiphophorus maculatus</i>         | 2 | marine      | heterorophic species | Southern platyfish                             | present | yes    |        |
| <b>Amphibians</b>                                                                            |                                      |   |             |                      |                                                |         |        |        |
|                                                                                              | <i>Andrias davidianus</i>            | 1 | terrestrial | heterorophic species | Chinese giant salamander                       | absent  | yes    | 1504   |
|                                                                                              | <i>Nanorana parkeri</i>              | 2 | terrestrial | heterorophic species | High Himalaya frog                             | present | yes    |        |
|                                                                                              | <i>Rana catesbeiana</i>              | 2 | terrestrial | heterorophic species | American bullfrog                              | absent  | yes    | 29138  |

|                                   |                                     |   |             |                      |                                |               |     |      |
|-----------------------------------|-------------------------------------|---|-------------|----------------------|--------------------------------|---------------|-----|------|
|                                   | <i>Xenopus laevis</i>               | 2 | terrestrial | heterorophic species | African clawed frog            | present       | yes |      |
| <b>Reptiles --&gt; Crocodylia</b> |                                     |   |             |                      |                                |               |     |      |
|                                   | <i>Alligator mississippiensis</i>   | 2 | terrestrial | heterorophic species | Crocodylian                    | present       | yes |      |
|                                   | <i>Alligator sinensis</i>           | 2 | terrestrial | heterorophic species | Crocodylian                    | <b>absent</b> | yes | 1    |
| <b>Reptiles --&gt; Squamata</b>   |                                     |   |             |                      |                                |               |     |      |
|                                   | <i>Gekko japonicus</i>              | 2 | terrestrial | heterorophic species | Geckos                         | <b>absent</b> | yes | 6957 |
|                                   | <i>Protobothrops mucrosquamatus</i> | 2 | terrestrial | heterorophic species | Snakes                         | absent        | yes | 0    |
| <b>Reptiles --&gt; Chelonii</b>   |                                     |   |             |                      |                                |               |     |      |
|                                   | <i>Chelonia mydas</i>               | 2 | terrestrial | heterorophic species | Green sea turtle               | present       | yes |      |
|                                   | <i>Chrysemys picta</i>              | 2 | terrestrial | heterorophic species | Painted turtle                 | present       | yes |      |
| <b>Birds</b>                      |                                     |   |             |                      |                                |               |     |      |
|                                   | <i>Anas platyrhynchos</i>           | 2 | terrestrial | heterorophic species | Mallard (duck)                 | present       | yes |      |
|                                   | <i>Calidris pugnax</i>              | 2 | terrestrial | heterorophic species | Ruff                           | <b>absent</b> | yes | 0    |
|                                   | <i>Ficedula albicollis</i>          | 2 | terrestrial | heterorophic species | Collared flycatcher            | present       | yes |      |
|                                   | <i>Gallus gallus</i>                | 2 | terrestrial | heterorophic species | Red junglefowl                 | present       | yes |      |
|                                   | <i>Lepidothrix coronata</i>         | 2 | terrestrial | heterorophic species | blue-crowned manakin           | absent        | yes | 0    |
| <b>Mammalian</b>                  |                                     |   |             |                      |                                |               |     |      |
|                                   | <i>Callithrix jacchus</i>           | 2 | terrestrial | heterorophic species | Common marmoset                | present       | yes |      |
|                                   | <i>Camelus dromedarius</i>          | 2 | terrestrial | heterorophic species | Dromedary                      | absent        | yes | 7    |
|                                   | <i>Canis lupus</i>                  | 2 | terrestrial | heterorophic species | Gray wolf                      | present       | no  |      |
|                                   | <i>Ceratotherium simum</i>          | 2 | terrestrial | heterorophic species | White rhinoceros               | present       | yes |      |
|                                   | <i>Chinchilla lanigera</i>          | 2 | terrestrial | heterorophic species | Long-tailed chinchilla         | present       | yes |      |
|                                   | <i>Chrysochloris asiatica</i>       | 2 | terrestrial | heterorophic species | Cape golden mole               | absent        | yes | 0    |
|                                   | <i>Colobus angolensis</i>           | 2 | terrestrial | heterorophic species | Angola colobus                 | absent        | yes | 0    |
|                                   | <i>Condylura cristata</i>           | 2 | terrestrial | heterorophic species | Star-nosed mole                | absent        | yes | 0    |
|                                   | <i>Dasybus novemcinctus</i>         | 2 | terrestrial | heterorophic species | Nine-banded armadillo          | present       | yes |      |
|                                   | <i>Dipodomys ordii</i>              | 2 | terrestrial | heterorophic species | Kangaroo rats                  | present       | yes |      |
|                                   | <i>Elephantulus edwardii</i>        | 2 | terrestrial | heterorophic species | Cape elephant shrew            | absent        | yes | 0    |
|                                   | <i>Eptesicus fuscus</i>             | 2 | terrestrial | heterorophic species | Big brown bats                 | absent        | yes | 0    |
|                                   | <i>Erinaceus europaeus</i>          | 2 | terrestrial | heterorophic species | European hedgehog              | present       | yes |      |
|                                   | <i>Felis catus</i>                  | 2 | terrestrial | heterorophic species | Cats                           | present       | yes |      |
|                                   | <i>Fukomys damarensis</i>           | 2 | terrestrial | heterorophic species | Damaraland mole-rat            | present       | yes |      |
|                                   | <i>Galeopterus variegatus</i>       | 2 | terrestrial | heterorophic species | Sunda flying lemur             | absent        | yes | 0    |
|                                   | <i>Homo sapiens</i>                 | 2 | terrestrial | heterorophic species | human                          | present       | yes |      |
|                                   | <i>Ictidomys tridecemlineatus</i>   | 2 | terrestrial | heterorophic species | Thirteen-lined ground squirrel | present       | yes |      |
|                                   | <i>Jaculus jaculus</i>              | 2 | terrestrial | heterorophic species | Jerboas                        | present       | yes |      |
|                                   | <i>Leptonychotes weddellii</i>      | 2 | marine      | heterorophic species | Weddell seal                   | absent        | yes | 0    |
|                                   | <i>Lipotes vexillifer</i>           | 2 | fresh-water | heterorophic species | Baiji                          | absent        | yes | 0    |
|                                   | <i>Loxodonta africana</i>           | 2 | terrestrial | heterorophic species | African bush elephant          | present       | no  |      |

|                                                            |                                    |   |             |                      |                               |         |        |       |
|------------------------------------------------------------|------------------------------------|---|-------------|----------------------|-------------------------------|---------|--------|-------|
|                                                            | <i>Melopsittacus undulatus</i>     | 1 | terrestrial | heterorophic species | Budgerigar                    | present | yes    |       |
|                                                            | <i>Meriones unguiculatus</i>       | 2 | terrestrial | heterorophic species | Mongolian gerbil              | absent  | yes    | 1442  |
|                                                            | <i>Mesocricetus auratus</i>        | 2 | terrestrial | heterorophic species | Golden hamster                | present | yes    |       |
|                                                            | <i>Microcebus murinus</i>          | 2 | terrestrial | heterorophic species | Gray mouse lemur              | present | yes    |       |
|                                                            | <i>Microtus ochrogaster</i>        | 2 | terrestrial | heterorophic species | Prairie vole                  | present | yes    |       |
|                                                            | <i>Monodelphis domestica</i>       | 2 | terrestrial | heterorophic species | Gray short-tailed opossum     | present | yes    |       |
|                                                            | <i>Mus musculus</i>                | 2 | terrestrial | heterorophic species | house mouse                   | present | yes    |       |
|                                                            | <i>Mustela putorius furo</i>       | 2 | terrestrial | heterorophic species | Ferret                        | present | yes    |       |
|                                                            | <i>Nomascus leucogenys</i>         | 2 | terrestrial | heterorophic species | Northern white-cheeked gibbon | present | yes    |       |
|                                                            | <i>Octodon degus</i>               | 2 | terrestrial | heterorophic species | octodontid rodents            | present | yes    |       |
|                                                            | <i>Odobenus rosmarus</i>           | 2 | marine      | heterorophic species | Walrus                        | present | yes    |       |
|                                                            | <i>Orcinus orca</i>                | 2 | marine      | heterorophic species | Killer whale                  | present | yes    |       |
|                                                            | <i>Orycteropus afer</i>            | 2 | terrestrial | heterorophic species | Aardvark                      | present | yes    |       |
|                                                            | <i>Otolemur garnettii</i>          | 2 | terrestrial | heterorophic species | Northern greater galago       | present | yes    |       |
|                                                            | <i>Ovis aries</i>                  | 2 | terrestrial | heterorophic species | Sheep                         | present | yes    |       |
|                                                            | <i>Pan paniscus</i>                | 2 | terrestrial | heterorophic species | Bonobo                        | present | yes    |       |
|                                                            | <i>Pongo abelii</i>                | 2 | terrestrial | heterorophic species | Sumatran orangutan            | present | yes    |       |
|                                                            | <i>Propithecus coquereli</i>       | 2 | terrestrial | heterorophic species | Coquerel sifaka (lemur)       | present | yes    |       |
|                                                            | <i>Pteropus vampyrus</i>           | 2 | terrestrial | heterorophic species | Megabat                       | present | yes    |       |
|                                                            | <i>Rattus norvegicus</i>           | 2 | terrestrial | heterorophic species | Brown rat                     | present | yes    |       |
|                                                            | <i>Saimiri boliviensis</i>         | 2 | terrestrial | heterorophic species | Squirrel monkey               | present | yes    |       |
|                                                            | <i>Sus scrofa</i>                  | 2 | terrestrial | heterorophic species | Wild boar                     | present | yes    |       |
|                                                            | <i>Trichechus manatus</i>          | 2 | marine      | heterorophic species | West Indian manatee           | present | yes    |       |
|                                                            | <i>Tupaia chinensis</i>            | 2 | terrestrial | heterorophic species | Tree shrew                    | present | yes    |       |
| <b>Bilateria --&gt; Protostomia --&gt; Molluscs</b>        |                                    |   |             |                      |                               |         |        |       |
|                                                            | <i>Aplysia californica</i>         | 2 | marine      | heterorophic species | California sea slug           | present | yes    |       |
|                                                            | <i>Biomphalaria glabrata</i>       | 2 | fresh water | heterorophic species | Snail                         | present | yes    |       |
|                                                            | <i>Crassostrea gigas</i>           | 2 | marine      | heterorophic species | Pacific oyster                | present | yes    |       |
|                                                            | <i>Haliotis discus</i>             | 1 | marine      | heterorophic species | Sea snail                     | absent  | yes    | 8154  |
|                                                            | <i>Haliotis diversicolor</i>       | 1 | marine      | heterorophic species | Sea snail                     | absent  | no     | 7435  |
|                                                            | <i>Meretrix meretrix</i>           | 1 | marine      | heterorophic species | Saltwater clams               | absent  | yes    | 3131  |
|                                                            | <i>Mytilus galloprovincialis</i>   | 1 | marine      | heterorophic species | Mediterranean mussel          | absent  | yes    | 19756 |
|                                                            | <i>Octopus bimaculoides</i>        | 1 | marine      | heterorophic species | Octopus                       | present | yes    |       |
|                                                            | <i>Pinctada fucata</i>             | 1 | marine      | heterorophic species | Akoya pearl oyster            | absent  | yes    | 1380  |
| <b>Bilateria --&gt; Protostomia --&gt; Platyhelminthes</b> |                                    |   |             |                      |                               |         |        |       |
|                                                            | <i>Clonorchis sinensis</i>         | 0 | terrestrial | animal parasites     | human liver fluke             | present | absent |       |
|                                                            | <i>Echinococcus granulosus</i>     | 0 | terrestrial | animal parasites     | cyclophyllid cestode          | present | absent |       |
|                                                            | <i>Echinococcus multilocularis</i> | 0 | terrestrial | animal parasites     | cyclophyllid tapeworm         | present | absent |       |



|                                                        |                                   |   |             |                      |                                      |         |        |    |
|--------------------------------------------------------|-----------------------------------|---|-------------|----------------------|--------------------------------------|---------|--------|----|
|                                                        | <i>Hymenolepis microstoma</i>     | 0 | terrestrial | animal parasites     | rodent tapeworm                      | present | absent |    |
|                                                        | <i>Schistosoma haematobium</i>    | 0 | terrestrial | animal parasites     | trematodes                           | present | absent |    |
|                                                        | <i>Schistosoma japonicum</i>      | 0 | terrestrial | animal parasites     | trematodes                           | present | absent |    |
|                                                        | <i>Schistosoma mansoni</i>        | 0 | terrestrial | animal parasites     | trematodes                           | present | absent |    |
|                                                        | <i>Schmidtea mediterranea</i>     | 0 | fresh water | heterorophic species | triclad                              | present | absent |    |
|                                                        | <i>Taenia solium</i>              | 0 | terrestrial | animal parasites     | pork tapeworm                        | present | absent |    |
| <b>Bilateria --&gt; Protostomia --&gt; Annelids</b>    |                                   |   |             |                      |                                      |         |        |    |
|                                                        | <i>Capitella teleta</i>           | 2 | marine      | heterorophic species | annelid worm                         | present | yes    |    |
|                                                        | <i>Helobdella robusta</i>         | 1 | fresh water | heterorophic species | leech                                | present | yes    |    |
| <b>Bilateria --&gt; Protostomia --&gt; Brachiopoda</b> |                                   |   |             |                      |                                      |         |        |    |
|                                                        | <i>Lingula anatina</i>            | 2 | marine      | heterorophic species |                                      | present | no     |    |
| <b>Bilateria --&gt; Protostomia --&gt; Rotifera</b>    |                                   |   |             |                      |                                      |         |        |    |
|                                                        | <i>Adineta vaga</i>               | 0 | fresh water | heterorophic species | bdelloid rotifer                     | present | absent |    |
| <b>Bilateria --&gt; Protostomia --&gt; Tardigrades</b> |                                   |   |             |                      |                                      |         |        |    |
|                                                        | <i>Hypsibius dujardini</i>        | 0 | terrestrial | heterorophic species | tardigrade                           | present | absent |    |
| <b>Bilateria --&gt; Protostomia --&gt; Nematodes</b>   |                                   |   |             |                      |                                      |         |        |    |
| <b>Classe I</b>                                        |                                   |   |             |                      |                                      |         |        |    |
|                                                        | <i>Trichuris muris</i>            | 2 | terrestrial | animal parasites     | parasite of mice                     | present | yes    |    |
|                                                        | <i>Trichuris suis</i>             | 2 | terrestrial | animal parasites     | whipworm                             | present | yes    |    |
| <b>Classe III</b>                                      |                                   |   |             |                      |                                      |         |        |    |
|                                                        | <i>Acanthocheilonema viteae</i>   | 2 | terrestrial | animal parasites     | rodent filarial worm                 | present | yes    |    |
|                                                        | <i>Anisakis simplex</i>           | 2 | terrestrial | animal parasites     | infect fish and marine mammals       | present | yes    |    |
|                                                        | <i>Ascaris lumbricoides</i>       | 2 | terrestrial | animal parasites     | causes ascariasis                    | present | yes    |    |
|                                                        | <i>Ascaris suum</i>               | 2 | terrestrial | animal parasites     | causes ascariasis                    | present | yes    |    |
|                                                        | <i>Brugia malayi</i>              | 2 | terrestrial | animal parasites     | causes elephantiasis                 | present | yes    |    |
|                                                        | <i>Brugia pahangi</i>             | 2 | terrestrial | animal parasites     | nematode that infects domestic cats  | present | yes    |    |
|                                                        | <i>Brugia timori</i>              | 3 | terrestrial | animal parasites     | human filarial parasitic nematode    | present | yes    |    |
|                                                        | <i>Dracunculus medinensis</i>     | 2 | terrestrial | animal parasites     | causess dracunculiasis               | present | yes    |    |
|                                                        | <i>Elaeophora elaphi</i>          | 2 | terrestrial | animal parasites     | parasitic roundworm                  | present | yes    |    |
|                                                        | <i>Gongylonema pulchrum</i>       | 3 | terrestrial | animal parasites     | human parasitic roundworms           | present | yes    |    |
|                                                        | <i>Loa loa</i>                    | 2 | terrestrial | animal parasites     | parasitic roundworm                  | present | yes    |    |
|                                                        | <i>Onchocerca flexuosa</i>        | 2 | terrestrial | animal parasites     | parasitic roundworm                  | present | no     |    |
|                                                        | <i>Onchocerca ochengi</i>         | 2 | terrestrial | animal parasites     | paraasitic roundworm                 | present | yes    |    |
|                                                        | <i>Onchocerca volvulus</i>        | 2 | terrestrial | animal parasites     | cause of river blindness in humans   | present | yes    |    |
|                                                        | <i>Ostertagia ostertagi</i>       | 1 | terrestrial | animal parasites     | brown stomach worm                   | present | yes    |    |
|                                                        | <i>Parascaris equorum</i>         | 0 | terrestrial | animal parasites     | equine roundworm                     | absent  | absent | 17 |
|                                                        | <i>Thelazia callipaeda</i>        | 2 | terrestrial | animal parasites     | cause thelaziasis                    | present | yes    |    |
|                                                        | <i>Toxocara canis</i>             | 2 | terrestrial | animal parasites     | dog roundworms                       | present | yes    |    |
|                                                        | <i>Wuchereria bancrofti</i>       | 2 | terrestrial | animal parasites     | human parasitic roundworms           | present | yes    |    |
| <b>Classe IV</b>                                       |                                   |   |             |                      |                                      |         |        |    |
|                                                        | <i>Bursaphelenchus xylophilus</i> | 5 | terrestrial | plant parasites      | pine wood nematode                   | present | yes    |    |
|                                                        | <i>Globodera pallida</i>          | 0 | terrestrial | plant parasites      | plant pathogen (especially potatoes) | present | absent |    |
|                                                        | <i>Meloidogyne arenaria</i>       | 3 | terrestrial | plant parasites      | peanut root knot nematode            | present | yes    |    |
|                                                        | <i>Meloidogyne floridensis</i>    | 2 | terrestrial | plant parasites      | root-knot nematodes                  | present | yes    |    |
|                                                        | <i>Meloidogyne hapla</i>          | 3 | terrestrial | plant parasites      | root-knot nematodes                  | present | yes    |    |

|                 |                                     |   |             |                      |                                                           |         |        |  |
|-----------------|-------------------------------------|---|-------------|----------------------|-----------------------------------------------------------|---------|--------|--|
|                 | <i>Meloidogyne incognita</i>        | 3 | terrestrial | plant parasites      | southern root-knot nematodes                              | present | yes    |  |
|                 | <i>Meloidogyne javanica</i>         | 4 | terrestrial | plant parasites      | tropical root-knot nematodes                              | present | yes    |  |
|                 | <i>Panagrellus redivivus</i>        | 3 | terrestrial | heterorophic species | beer mat nematode                                         | present | yes    |  |
|                 | <i>Strongyloides papillosus</i>     | 1 | terrestrial | animal parasites     | human pathogenic parasitic roundworm                      | present | yes    |  |
|                 | <i>Strongyloides ratti</i>          | 1 | terrestrial | animal parasites     | causess strongyloidiasis                                  | present | yes    |  |
|                 | <i>Strongyloides venezuelensis</i>  | 1 | terrestrial | animal parasites     | threadworm, gastro-intestinal parasite in mouse           | present | yes    |  |
| <b>Classe V</b> |                                     |   |             |                      |                                                           |         |        |  |
|                 | <i>Ancylostoma caninum</i>          | 2 | terrestrial | animal parasites     | infects the small intestine of dogs                       | present | yes    |  |
|                 | <i>Ancylostoma ceylanicum</i>       | 3 | terrestrial | animal parasites     | zoonotic hookworm                                         | present | yes    |  |
|                 | <i>Ancylostoma duodenale</i>        | 3 | terrestrial | animal parasites     | Old World hookworm                                        | present | yes    |  |
|                 | <i>Angiostrongylus cantonensis</i>  | 2 | terrestrial | animal parasites     | roundworms that causes angiostrongyliasis                 | present | yes    |  |
|                 | <i>Caenorhabditis angaria</i>       | 3 | terrestrial | heterorophic species | roundworms                                                | present | yes    |  |
|                 | <i>Caenorhabditis brenneri</i>      | 3 | terrestrial | heterorophic species | roundworms                                                | present | yes    |  |
|                 | <i>Caenorhabditis briggsae</i>      | 4 | terrestrial | heterorophic species | roundworms                                                | present | yes    |  |
|                 | <i>Caenorhabditis elegans</i>       | 4 | terrestrial | heterorophic species | roundworms                                                | present | yes    |  |
|                 | <i>Caenorhabditis japonica</i>      | 3 | terrestrial | heterorophic species | roundworms                                                | present | yes    |  |
|                 | <i>Caenorhabditis remanei</i>       | 3 | terrestrial | heterorophic species | roundworms                                                | present | yes    |  |
|                 | <i>Caenorhabditis sinica</i>        | 3 | terrestrial | heterorophic species | roundworms                                                | present | yes    |  |
|                 | <i>Caenorhabditis tropicalis</i>    | 2 | terrestrial | heterorophic species | roundworms                                                | present | yes    |  |
|                 | <i>Cylicostephanus goldi</i>        | 2 | terrestrial | animal parasites     | animal parasites nematodes                                | present | no     |  |
|                 | <i>Dictyocaulus viviparus</i>       | 2 | terrestrial | animal parasites     | parasites of horses                                       | present | yes    |  |
|                 | <i>Dirofilaria immitis</i>          | 2 | terrestrial | animal parasites     | heartworm or dog heartworm                                | present | yes    |  |
|                 | <i>Haemonchus contortus</i>         | 1 | terrestrial | animal parasites     | pathogenic nematodes of ruminants                         | present | yes    |  |
|                 | <i>Haemonchus placei</i>            | 2 | terrestrial | animal parasites     | parasitic roundworms                                      | present | yes    |  |
|                 | <i>Heligmosomoides polygyrus</i>    | 3 | terrestrial | animal parasites     | intestinal roundworm of rodents                           | present | yes    |  |
|                 | <i>Necator americanus</i>           | 2 | terrestrial | animal parasites     | New World hookworm                                        | present | yes    |  |
|                 | <i>Nippostrongylus brasiliensis</i> | 1 | terrestrial | animal parasites     | gastrointestinal roundworm                                | present | yes    |  |
|                 | <i>Oesophagostomum dentatum</i>     | 2 | terrestrial | animal parasites     | human parasitic nematodes                                 | present | no     |  |
|                 | <i>Parastrongyloides trichosuri</i> | 0 | terrestrial | animal parasites     | an intestinal parasite of Australian Brush-tailed possums | present | absent |  |
|                 | <i>Pristionchus exspectatus</i>     | 2 | terrestrial | animal parasites     | roundworms                                                | present | yes    |  |
|                 | <i>Pristionchus pacificus</i>       | 2 | terrestrial | animal parasites     | roundworms                                                | present | yes    |  |
|                 | <i>Steinernema carpocapsae</i>      | 4 | terrestrial | animal parasites     | entomopathogenic nematodes                                | present | yes    |  |
|                 | <i>Steinernema feltiae</i>          | 2 | terrestrial | animal parasites     | entomopathogenic nematodes                                | present | yes    |  |
|                 | <i>Steinernema glaseri</i>          | 1 | terrestrial | animal parasites     | entomopathogenic nematodes                                | present | yes    |  |
|                 | <i>Steinernema monticolum</i>       | 2 | terrestrial | animal parasites     | insect-parasitic nematode                                 | present | yes    |  |
|                 | <i>Steinernema scapterisci</i>      | 2 | terrestrial | animal parasites     | mole cricket nematode                                     | present | yes    |  |

|                                                                         |                                  |   |             |                      |                                       |         |        |       |
|-------------------------------------------------------------------------|----------------------------------|---|-------------|----------------------|---------------------------------------|---------|--------|-------|
|                                                                         | <i>Strongylus vulgaris</i>       | 1 | terrestrial | animal parasites     | blood worm, common horse parasite     | present | no     |       |
|                                                                         | <i>Teladorsagia circumcincta</i> | 2 | terrestrial | animal parasites     | nematodes that infect sheep and goats | present | yes    |       |
| <b>Classe Other chromadoera</b>                                         |                                  |   |             |                      |                                       |         |        |       |
|                                                                         | <i>Enterobius vermicularis</i>   | 1 | terrestrial | animal parasites     | Pinworm (enterobiasis)                | present | yes    |       |
|                                                                         | <i>Romanomermis culicivorax</i>  | 2 | terrestrial | animal parasites     | endoparasites in arthropods           | present | yes    |       |
|                                                                         | <i>Syphacia muris</i>            | 1 | terrestrial | animal parasites     | rat pinworm                           | present | yes    |       |
|                                                                         | <i>Trichinella nativa</i>        | 1 | terrestrial | animal parasites     | nematode                              | absent  | yes    | 16    |
|                                                                         | <i>Trichinella spiralis</i>      | 1 | terrestrial | animal parasites     | nematode                              | present | yes    |       |
| <b>Opisthokonts --&gt; Metazoa --&gt; Protostomia --&gt; Arthropoda</b> |                                  |   |             |                      |                                       |         |        |       |
| <b>Crustacea</b>                                                        |                                  |   |             |                      |                                       |         |        |       |
|                                                                         | <i>Daphnia magna</i>             | 2 | fresh water | heterorophic species | small planctonic crustacean           | absent  | yes    | 15380 |
|                                                                         | <i>Daphnia pulex</i>             | 2 | fresh water | heterorophic species | small planctonic crustacean           | present | yes    |       |
|                                                                         | <i>Eriocheir sinensis</i>        | 1 | marine      | heterorophic species | Chinese mitten crab                   | present | yes    |       |
|                                                                         | <i>Litopenaeus vannamei</i>      | 1 | marine      | heterorophic species | Whiteleg shrimp                       | present | yes    |       |
|                                                                         | <i>Penaeus monodon</i>           | 1 | marine      | heterorophic species | Asian tiger shrimp                    | present | yes    |       |
|                                                                         | <i>Pseudodiaptomus poplesia</i>  | 1 | marine      | heterorophic species | a calanoid copepod                    | absent  | yes    | 0     |
|                                                                         | <i>Scylla paramamosain</i>       | 2 | marine      | heterorophic species | mud and mangrove crab                 | present | yes    |       |
| <b>Chelicerata</b>                                                      |                                  |   |             |                      |                                       |         |        |       |
|                                                                         | <i>Amblyomma americanum</i>      | 2 | terrestrial | animal parasites     | Lone Star tick                        | present | yes    |       |
|                                                                         | <i>Dermacentor variabilis</i>    | 1 | terrestrial | animal parasites     | American dog ticks                    | present | yes    |       |
|                                                                         | <i>Haemaphysalis longicornis</i> | 1 | terrestrial | animal parasites     | ticks                                 | present | yes    |       |
|                                                                         | <i>Ixodes scapularis</i>         | 1 | terrestrial | animal parasites     | deer tick or black-legged tick        | present | yes    |       |
|                                                                         | <i>Limulus polyphemus</i>        | 1 | marine      | heterorophic species | Atlantic horseshoe crab               | present | yes    |       |
|                                                                         | <i>Onychiurus arcticus</i>       | 1 | terrestrial | heterorophic species | Arctic springtail                     | present | yes    |       |
|                                                                         | <i>Rhipicephalus microplus</i>   | 1 | terrestrial | animal parasites     | Asian blue tick                       | present | no     |       |
|                                                                         | <i>Sarcoptes scabiei</i>         | 2 | terrestrial | animal parasites     | itch mites                            | present | yes    |       |
|                                                                         | <i>Stegodyphus mimosarum</i>     | 1 | terrestrial | heterorophic species | spiders                               | present | yes    |       |
|                                                                         | <i>Tetranychus urticae</i>       | 1 | terrestrial | plant parasites      | red spider mite                       | present | yes    |       |
| <b>Myriapoda</b>                                                        |                                  |   |             |                      |                                       |         |        |       |
|                                                                         | <i>Strigamia maritima</i>        | 2 | marine      | heterorophic species | European centipede                    | present | yes    |       |
| <b>Insecta --&gt; Hymenoptera</b>                                       |                                  |   |             |                      |                                       |         |        |       |
|                                                                         | <i>Acromyrmex echinator</i>      | 0 | terrestrial | heterorophic species | New World ants                        | present | absent |       |
|                                                                         | <i>Apis florea</i>               | 0 | terrestrial | heterorophic species | dwarf honey bee                       | present | absent |       |
|                                                                         | <i>Apis mellifera</i>            | 0 | terrestrial | heterorophic species | western honey bee                     | present | absent |       |
|                                                                         | <i>Atta cephalotes</i>           | 0 | terrestrial | heterorophic species | leafcutter ant                        | present | absent |       |
|                                                                         | <i>Bombus impatiens</i>          | 0 | terrestrial | heterorophic species | common eastern bumble bee             | present | absent |       |
|                                                                         | <i>Bombus terrestris</i>         | 0 | terrestrial | heterorophic species | buff-tailed bumblebee                 | present | absent |       |
|                                                                         | <i>Camponotus floridanus</i>     | 0 | terrestrial | heterorophic species | Florida capenter ant                  | present | absent |       |
|                                                                         | <i>Harpegnathos saltator</i>     | 0 | terrestrial | heterorophic species | Indian jumping ant                    | present | absent |       |
|                                                                         | <i>Linepithema humile</i>        | 0 | terrestrial | heterorophic species | Argentine ant                         | present | absent |       |
|                                                                         | <i>Megachile rotundata</i>       | 0 | terrestrial | heterorophic species | alfalfa leafcutter bee                | present | absent |       |
|                                                                         | <i>Nasonia giraulti</i>          | 0 | terrestrial | heterorophic species | parasitoid                            | present | absent |       |

|                |                                  |   |             |                      |                         |         |        |  |
|----------------|----------------------------------|---|-------------|----------------------|-------------------------|---------|--------|--|
|                | <i>Nasonia longicornis</i>       | 0 | terrestrial | heterorophic species | parasitoid              | present | absent |  |
|                | <i>Nasonia vitripennis</i>       | 0 | terrestrial | heterorophic species | parasitoid              | present | absent |  |
|                | <i>Pogonomyrmex barbatus</i>     | 0 | terrestrial | heterorophic species | red harvester ant       | present | absent |  |
|                | <i>Solenopsis invicta</i>        | 0 | terrestrial | heterorophic species | red imported fire ant   | present | absent |  |
|                | <i>Wasmannia auropunctata</i>    | 0 | terrestrial | heterorophic species | little fire ant         | present | absent |  |
| <b>Diptera</b> |                                  |   |             |                      |                         |         |        |  |
|                | <i>Aedes aegypti</i>             | 0 | terrestrial | heterorophic species | yellow fever mosquito   | present | absent |  |
|                | <i>Aedes albopictus</i>          | 0 | terrestrial | heterorophic species | Asian tiger mosquito    | present | absent |  |
|                | <i>Anopheles albimanus</i>       | 0 | terrestrial | heterorophic species | mosquito                | present | absent |  |
|                | <i>Anopheles aquasalis</i>       | 0 | terrestrial | heterorophic species | mosquito                | present | absent |  |
|                | <i>Anopheles arabiensis</i>      | 0 | terrestrial | heterorophic species | mosquito                | present | absent |  |
|                | <i>Anopheles atroparvus</i>      | 0 | terrestrial | heterorophic species | mosquito                | present | absent |  |
|                | <i>Anopheles christyi</i>        | 0 | terrestrial | heterorophic species | mosquito                | present | absent |  |
|                | <i>Anopheles coluzzii</i>        | 0 | terrestrial | heterorophic species | mosquito                | present | absent |  |
|                | <i>Anopheles culicifacies</i>    | 0 | terrestrial | heterorophic species | mosquito                | present | absent |  |
|                | <i>Anopheles darlingi</i>        | 0 | terrestrial | heterorophic species | mosquito                | present | absent |  |
|                | <i>Anopheles dirus</i>           | 0 | terrestrial | heterorophic species | mosquito                | present | absent |  |
|                | <i>Anopheles epiroticus</i>      | 0 | terrestrial | heterorophic species | mosquito                | present | absent |  |
|                | <i>Anopheles farauti</i>         | 0 | terrestrial | heterorophic species | mosquito                | present | absent |  |
|                | <i>Anopheles funestus</i>        | 0 | terrestrial | heterorophic species | mosquito                | present | absent |  |
|                | <i>Anopheles gambiae</i>         | 0 | terrestrial | heterorophic species | mosquito                | present | absent |  |
|                | <i>Anopheles maculatus</i>       | 0 | terrestrial | heterorophic species | mosquito                | present | absent |  |
|                | <i>Anopheles melas</i>           | 0 | terrestrial | heterorophic species | mosquito                | present | absent |  |
|                | <i>Anopheles merus</i>           | 0 | terrestrial | heterorophic species | mosquito                | present | absent |  |
|                | <i>Anopheles minimus</i>         | 0 | terrestrial | heterorophic species | mosquito                | present | absent |  |
|                | <i>Anopheles quadriannulatus</i> | 0 | terrestrial | heterorophic species | mosquito                | present | absent |  |
|                | <i>Anopheles sinensis</i>        | 0 | terrestrial | heterorophic species | mosquito                | present | absent |  |
|                | <i>Anopheles stephensi</i>       | 0 | terrestrial | heterorophic species | mosquito                | present | absent |  |
|                | <i>Clogmia albipunctata</i>      | 0 | terrestrial | heterorophic species | drain flies             | present | absent |  |
|                | <i>Culex quinquefasciatus</i>    | 0 | terrestrial | heterorophic species | southern house mosquito | present | absent |  |
|                | <i>Drosophila albomicans</i>     | 0 | terrestrial | heterorophic species | fly                     | present | absent |  |
|                | <i>Drosophila ananassae</i>      | 0 | terrestrial | heterorophic species | fly                     | present | absent |  |
|                | <i>Drosophila biarmipes</i>      | 0 | terrestrial | heterorophic species | fly                     | present | absent |  |
|                | <i>Drosophila bipectinata</i>    | 0 | terrestrial | heterorophic species | fly                     | present | absent |  |
|                | <i>Drosophila elegans</i>        | 0 | terrestrial | heterorophic species | fly                     | present | absent |  |
|                | <i>Drosophila erecta</i>         | 0 | terrestrial | heterorophic species | fly                     | present | absent |  |
|                | <i>Drosophila eugracilis</i>     | 0 | terrestrial | heterorophic species | fly                     | present | absent |  |

|                  |                                     |   |             |                      |                                       |         |        |        |
|------------------|-------------------------------------|---|-------------|----------------------|---------------------------------------|---------|--------|--------|
|                  | <i>Drosophila ficusphila</i>        | 0 | terrestrial | heterorophic species | fly                                   | present | absent |        |
|                  | <i>Drosophila grimshawi</i>         | 0 | terrestrial | heterorophic species | fly                                   | present | absent |        |
|                  | <i>Drosophila kikkawai</i>          | 0 | terrestrial | heterorophic species | fly                                   | present | absent |        |
|                  | <i>Drosophila melanogaster</i>      | 0 | terrestrial | heterorophic species | fly                                   | present | absent |        |
|                  | <i>Drosophila miranda</i>           | 0 | terrestrial | heterorophic species | fly                                   | present | absent |        |
|                  | <i>Drosophila mojavensis</i>        | 0 | terrestrial | heterorophic species | fly                                   | present | absent |        |
|                  | <i>Drosophila neotestacea</i>       | 0 | terrestrial | heterorophic species | fly                                   | present | absent |        |
|                  | <i>Drosophila persimilis</i>        | 0 | terrestrial | heterorophic species | fly                                   | present | absent |        |
|                  | <i>Drosophila pseudoobscura</i>     | 0 | terrestrial | heterorophic species | fly                                   | present | absent |        |
|                  | <i>Drosophila rhopaloa</i>          | 0 | terrestrial | heterorophic species | fly                                   | present | absent |        |
|                  | <i>Drosophila santomea</i>          | 0 | terrestrial | heterorophic species | fly                                   | present | absent |        |
|                  | <i>Drosophila sechellia</i>         | 0 | terrestrial | heterorophic species | fly                                   | present | absent |        |
|                  | <i>Drosophila simulans</i>          | 0 | terrestrial | heterorophic species | fly                                   | present | absent |        |
|                  | <i>Drosophila takahashii</i>        | 0 | terrestrial | heterorophic species | fly                                   | present | absent |        |
|                  | <i>Drosophila virilis</i>           | 0 | terrestrial | heterorophic species | fly                                   | present | absent |        |
|                  | <i>Drosophila willistoni</i>        | 0 | terrestrial | heterorophic species | fly                                   | present | absent |        |
|                  | <i>Drosophila yakuba</i>            | 0 | terrestrial | heterorophic species | fly                                   | present | absent |        |
|                  | <i>Episyrphus balteatus</i>         | 0 | terrestrial | heterorophic species | marmalade hoverfly                    | present | absent |        |
|                  | <i>Glossina austeni</i>             | 0 | terrestrial | heterorophic species | fly                                   | present | absent |        |
|                  | <i>Glossina brevipalpis</i>         | 0 | terrestrial | heterorophic species | fly                                   | present | absent |        |
|                  | <i>Glossina fuscipes</i>            | 0 | terrestrial | heterorophic species | fly                                   | present | absent |        |
|                  | <i>Glossina morsitans morsitans</i> | 0 | terrestrial | heterorophic species | fly                                   | present | absent |        |
|                  | <i>Glossina pallidipes</i>          | 0 | terrestrial | heterorophic species | Tsetse fly                            | present | absent |        |
|                  | <i>Lutzomyia longipalpis</i>        | 0 | terrestrial | heterorophic species | blood sucker                          | present | absent |        |
|                  | <i>Mayetiola destructor</i>         | 0 | terrestrial | heterorophic species | Hessian fly or barley midge           | present | absent |        |
|                  | <i>Megaselia scalaris</i>           | 0 | terrestrial | heterorophic species | fly                                   | present | absent |        |
|                  | <i>Musca domestica</i>              | 0 | terrestrial | heterorophic species | housefly                              | present | absent |        |
|                  | <i>Phlebotomus papatasi</i>         | 0 | terrestrial | heterorophic species | sand flies                            | present | absent |        |
|                  | <i>Stomoxys calcitrans</i>          | 0 | terrestrial | heterorophic species | stable fly, dog fly                   | present | absent |        |
|                  | <i>Triatoma infestans</i>           | 0 | terrestrial | heterorophic species | winchuka, "kissing bug", blood sucker | absent  | absent | 3488   |
| <b>Hemiptera</b> |                                     |   |             |                      |                                       |         |        |        |
|                  | <i>Acyrtosiphon kondoi</i>          | 2 | terrestrial | plant parasites      | aphid                                 | absent  | yes    | 23.041 |
|                  | <i>Acyrtosiphon pisum</i>           | 4 | terrestrial | plant parasites      | pea aphid                             | present | yes    |        |
|                  | <i>Aphis gossypii</i>               | 2 | terrestrial | plant parasites      | melon and cotton aphid                | present | yes    |        |
|                  | <i>Cimex lectularius</i>            | 0 | terrestrial | free-living species  | Bed bugs - human primary hosts        | present | absent |        |
|                  | <i>Diaphorina citri</i>             | 1 | terrestrial | plant parasites      | Asian citrus psyllid                  | present | yes    |        |
|                  | <i>Maconellicoccus hirsutus</i>     | 1 | terrestrial | plant parasites      | pink, grape or hibiscus mealybug      | absent  | yes    | 7.696  |

|              |                                |   |             |                      |                                                                        |         |        |         |
|--------------|--------------------------------|---|-------------|----------------------|------------------------------------------------------------------------|---------|--------|---------|
|              | <i>Myzus ascalonicus</i>       | 3 | terrestrial | plant parasites      | Shallot aphid                                                          | absent  | yes    | 22.942  |
|              | <i>Myzus persicae</i>          | 3 | terrestrial | plant parasites      | Green peach aphid                                                      | present | yes    |         |
|              | <i>Nilaparvata lugens</i>      | 1 | terrestrial | plant parasites      | brown planthopper                                                      | absent  | yes    | 118.141 |
|              | <i>Peregrinus maidis</i>       | 1 | terrestrial | plant parasites      | Corn planthopper                                                       | absent  | yes    | 20.678  |
|              | <i>Rhodnius prolixus</i>       | 0 | terrestrial | free-living species  | principal triatomine vector of the Chagas (trypanosoma cruzi) parasite | present | absent |         |
|              | <i>Rhopalosiphum maidis</i>    | 3 | terrestrial | plant parasites      | Corn leaf aphid                                                        | present | yes    |         |
|              | <i>Rhopalosiphum padi</i>      | 3 | terrestrial | plant parasites      | Bird cherry-oat aphid                                                  | present | yes    |         |
|              | <i>Sitobion avenae</i>         | 1 | terrestrial | plant parasites      | English grain aphid                                                    | absent  | yes    | 3.614   |
| Lepidoptera  |                                |   |             |                      |                                                                        |         |        |         |
|              | <i>Agrotis segetum</i>         | 1 | terrestrial | heterorophic species | turnip moth                                                            | present | yes    |         |
|              | <i>Amyelois transitella</i>    | 3 | terrestrial | heterorophic species | navel orangeworm                                                       | present | yes    |         |
|              | <i>Antheraea assama</i>        | 1 | terrestrial | heterorophic species | muga silkworm                                                          | absent  | yes    | 35,191  |
|              | <i>Antheraea mylitta</i>       | 1 | terrestrial | heterorophic species | tasar silkworm                                                         | absent  | yes    | 3.913   |
|              | <i>Antheraea yamamai</i>       | 1 | terrestrial | heterorophic species | Japanese silk moth                                                     | absent  | yes    | 662     |
|              | <i>Bicyclus anynana</i>        | 1 | terrestrial | heterorophic species | squinting bush brown                                                   | absent  | yes    | 101.595 |
|              | <i>Bombyx mori</i>             | 2 | terrestrial | heterorophic species | domestic silkmoth                                                      | present | yes    |         |
|              | <i>Danaus plexippus</i>        | 2 | terrestrial | heterorophic species | monarch butterfly                                                      | present | yes    |         |
|              | <i>Heliconius melpomene</i>    | 3 | terrestrial | heterorophic species | postman butterfly                                                      | present | yes    |         |
|              | <i>Helicoverpa armigera</i>    | 1 | terrestrial | heterorophic species | cotton bullworm, corn earworm                                          | present | yes    |         |
|              | <i>Heliothis virescens</i>     | 1 | terrestrial | heterorophic species | tobacco budworm                                                        | present | yes    |         |
|              | <i>Manduca sexta</i>           | 1 | terrestrial | heterorophic species | Carolina sphinx moth                                                   | present | yes    |         |
|              | <i>Melitaea cinxia</i>         | 2 | terrestrial | heterorophic species | Glanville fritillary butterfly                                         | present | yes    |         |
|              | <i>Ostrinia nubilasis</i>      | 1 | terrestrial | heterorophic species | European corn borer                                                    | absent  | yes    | 15.040  |
|              | <i>Papilio machaon</i>         | 2 | terrestrial | heterorophic species | Old World swallowtail butterfly                                        | present | yes    |         |
|              | <i>Papilio polytes</i>         | 2 | terrestrial | heterorophic species | common mormon butterfly                                                | present | yes    |         |
|              | <i>Papilio xuthus</i>          | 2 | terrestrial | heterorophic species | Asian swallowtail butterfly                                            | present | yes    |         |
|              | <i>Plutella xylostella</i>     | 1 | terrestrial | heterorophic species | diamondback moth, cabbage moth                                         | present | yes    |         |
|              | <i>Spodoptera exigua</i>       | 1 | terrestrial | heterorophic species | armyworms pests                                                        | absent  | yes    | 16359   |
|              | <i>Spodoptera frugiperda</i>   | 2 | terrestrial | heterorophic species | armyworms pests                                                        | present | yes    |         |
|              | <i>Spodoptera littoralis</i>   | 1 | terrestrial | heterorophic species | armyworms pests                                                        | absent  | yes    | 72.261  |
|              | <i>Trichoplusia ni</i>         | 1 | terrestrial | heterorophic species | cabbage looper, pests                                                  | present | yes    |         |
| Phthiraptera |                                |   |             |                      |                                                                        |         |        |         |
|              | <i>Pediculus humanus</i>       | 0 | terrestrial | heterorophic species | head louse, ectoparasite of humans                                     | present | yes    |         |
| Coleoptera   |                                |   |             |                      |                                                                        |         |        |         |
|              | <i>Dendroctonus ponderosae</i> | 2 | terrestrial | heterorophic species | mountain pine beetle                                                   | present | yes    |         |
|              | <i>Pissodes strobi</i>         | 1 | terrestrial | plant parasites      | white pine weevil                                                      | absent  | yes    | 69.475  |
|              | <i>Sitophilus oryzae</i>       | 1 | terrestrial | plant parasites      | rice weevil                                                            | absent  | yes    | 25.748  |
|              | <i>Sphenophorus levis</i>      | 1 | terrestrial | plant parasites      | weevil                                                                 | absent  | yes    | 3.447   |
|              | <i>Tribolium castaneum</i>     | 1 | terrestrial | heterorophic species | red flour beetle                                                       | present | yes    |         |
| Orthoptera   |                                |   |             |                      |                                                                        |         |        |         |

|                                           |                                   |   |             |                      |                                              |         |        |         |
|-------------------------------------------|-----------------------------------|---|-------------|----------------------|----------------------------------------------|---------|--------|---------|
|                                           | <i>Gryllus bimaculatus</i>        | 1 | terrestrial | heterorophic species | cricket                                      | present | yes    |         |
|                                           | <i>Schistocerca gregaria</i>      | 1 | terrestrial | heterorophic species | locust                                       | absent  | yes    | 34.709  |
| <b>Blattoptera</b>                        |                                   |   |             |                      |                                              |         |        |         |
|                                           | <i>Coptotermes formosanus</i>     | 1 | terrestrial | heterorophic species | formosan subterranean termite                | absent  | yes    | 142.814 |
|                                           | <i>Periplaneta americana</i>      | 1 | terrestrial | heterorophic species | america cockroach                            | absent  | yes    | 5.394   |
|                                           | <i>Reticulitermes flavipes</i>    | 1 | terrestrial | heterorophic species | eastern subterranean termite                 | absent  | yes    | 23.767  |
|                                           | <i>Zootermopsis nevadensis</i>    | 1 | terrestrial | heterorophic species | eusocial dampwood termite                    | present | yes    |         |
| <b>Archaeplastida --&gt; Glaucophytes</b> |                                   |   |             |                      |                                              |         |        |         |
|                                           | <i>Cyanophora paradoxa</i>        | 3 | fresh water | autotrophic species  | algae, model organism                        | present | no     |         |
| <b>Rhodophytes</b>                        |                                   |   |             |                      |                                              |         |        |         |
|                                           | <i>Chondrus crispus</i>           | 0 | marine      | autotrophic species  | red algae called Irish moss or carageen moss | present | absent |         |
|                                           | <i>Cyanidioschyzon merolae</i>    | 1 | marine      | autotrophic species  | red algae                                    | present | yes    |         |
|                                           | <i>Galdieria sulphuraria</i>      | 1 | marine      | autotrophic species  | extermophilic red algae                      | present | yes    |         |
|                                           | <i>Grateloupia livida</i>         | 1 | marine      | autotrophic species  | red algae                                    | present | yes    |         |
|                                           | <i>Porphyridium purpureum</i>     | 1 | marine      | autotrophic species  | red algae                                    | present | yes    |         |
| <b>Green algae - Chlorophyta</b>          |                                   |   |             |                      |                                              |         |        |         |
|                                           | <i>Alnus glutinosa</i>            | 1 | terrestrial | autotrophic species  | black alder                                  | absent  | yes    | 32620   |
|                                           | <i>Chlamydomonas reinhardtii</i>  | 1 | marine      | autotrophic species  | green algae                                  | present | yes    |         |
|                                           | <i>Chlorella variabilis</i>       | 1 | marine      | autotrophic species  | green algae                                  | present | yes    |         |
|                                           | <i>Gonium pectorale</i>           | 1 | marine      | autotrophic species  | colonial algae                               | absent  | yes    | 0       |
|                                           | <i>Klebsormidium flaccidum</i>    | 1 | marine      | autotrophic species  | filamentous charophyte green algae           | present | yes    |         |
|                                           | <i>Monoraphidium neglectum</i>    | 1 | marine      | autotrophic species  | green algae                                  | present | yes    |         |
|                                           | <i>Volvox carteri</i>             | 1 | marine      | autotrophic species  | colonial green algae                         | present | yes    |         |
| <b>Moss - Bryophyta</b>                   |                                   |   |             |                      |                                              |         |        |         |
|                                           | <i>Physcomitrella patens</i>      | 1 | terrestrial | autotrophic species  | moss                                         | present | yes    |         |
| <b>Ferns</b>                              |                                   |   |             |                      |                                              |         |        |         |
|                                           | <i>Acrostichum aureum</i>         | 1 | terrestrial | autotrophic species  | golden leather fern                          | absent  | yes    | 0       |
|                                           | <i>Acrostichum speciosum</i>      | 1 | terrestrial | autotrophic species  | Mangrove fern                                | absent  | yes    | 0       |
|                                           | <i>Adiantum capillus</i>          | 1 | terrestrial | autotrophic species  | black maidenhair fern                        | absent  | yes    | 30544   |
|                                           | <i>Azolla filiculoides</i>        | 1 | fresh water | autotrophic species  | floating aquatic fern                        | present | yes    |         |
|                                           | <i>Ceratopteris richardii</i>     | 1 | terrestrial | autotrophic species  | fern                                         | absent  | yes    | 5133    |
|                                           | <i>Ceratopteris thalictroides</i> | 1 | terrestrial | autotrophic species  | water sprite, Indian fern                    | absent  | yes    | 0       |
|                                           | <i>Lygodium japonicum</i>         | 1 | terrestrial | autotrophic species  | vine-like fern or Japanese climbing fern     | absent  | yes    | 0       |
|                                           | <i>Pteridium aquilinum</i>        | 1 | terrestrial | autotrophic species  | eagel fern                                   | absent  | yes    | 424     |
| <b>Ferns - relative</b>                   |                                   |   |             |                      |                                              |         |        |         |
|                                           | <i>Selaginella moellendorffii</i> | 4 | terrestrial | autotrophic species  | model organism                               | present | yes    |         |
| <b>Gymnospermes</b>                       |                                   |   |             |                      |                                              |         |        |         |
|                                           | <i>Picea sitchensis</i>           | 2 | terrestrial | autotrophic species  | sitka spruce                                 | present | yes    |         |
| <b>Marchantiales</b>                      |                                   |   |             |                      |                                              |         |        |         |
|                                           | <i>Marchantia polymorpha</i>      | 1 | terrestrial | autotrophic species  | umbrella liverwort                           | present | yes    |         |

| Angiospermes - Dicotylédons |                                  |   |             |                     |                                                                  |         |     |  |
|-----------------------------|----------------------------------|---|-------------|---------------------|------------------------------------------------------------------|---------|-----|--|
|                             | <i>Alnus glutinosa</i>           | 1 | terrestrial | autotrophic species | black alder                                                      |         | yes |  |
|                             | <i>Amborella trichopoda</i>      | 2 | terrestrial | autotrophic species | understory shrubs                                                |         | yes |  |
|                             | <i>Arabidopsis lyrata</i>        | 3 | terrestrial | autotrophic species | thale cress, mouse-ear cress                                     | present | yes |  |
|                             | <i>Arabidopsis thaliana</i>      | 3 | terrestrial | autotrophic species | thale cress, mouse-ear cress                                     | present | yes |  |
|                             | <i>Artemisia annua</i>           | 1 | terrestrial | autotrophic species | sweet wormwood                                                   |         | yes |  |
|                             | <i>Beta vulgaris</i>             | 4 | terrestrial | autotrophic species | sugar beet, spinach beet                                         | present | yes |  |
|                             | <i>Botryococcus braunii</i>      | 1 | marine      | autotrophic species | green, pyramid-shaped planktonic microalgua                      | present | no  |  |
|                             | <i>Brachypodium distachyon</i>   | 3 | terrestrial | autotrophic species | purple false brome                                               | present | yes |  |
|                             | <i>Brassica napus</i>            | 3 | terrestrial | autotrophic species | oilseed rape                                                     | present | yes |  |
|                             | <i>Brassica oleracea</i>         | 4 | terrestrial | autotrophic species | wild cabbage plants                                              | present | yes |  |
|                             | <i>Camelina sativa</i>           | 3 | terrestrial | autotrophic species | gold-of-pleasure or false flax                                   | present | yes |  |
|                             | <i>Camellia sinensis</i>         | 1 | terrestrial | autotrophic species | tea plant                                                        | present | no  |  |
|                             | <i>Catharanthus roseus</i>       | 1 | terrestrial | autotrophic species | Madagascar periwinkle                                            | present | no  |  |
|                             | <i>Cicer arietinum</i>           | 3 | terrestrial | autotrophic species | chickpea                                                         | present | yes |  |
|                             | <i>Citrus clementina</i>         | 3 | terrestrial | autotrophic species | clementine                                                       | present | yes |  |
|                             | <i>Citrus reticulata</i>         | 1 | terrestrial | autotrophic species | mandarin orange                                                  | present | no  |  |
|                             | <i>Coffea canephora</i>          | 3 | terrestrial | autotrophic species | robusta coffee                                                   | present | yes |  |
|                             | <i>Cucumis melo</i>              | 3 | terrestrial | autotrophic species | muskmelon                                                        | present | yes |  |
|                             | <i>Dendrobium nobile</i>         | 1 | terrestrial | autotrophic species | member of Orchidaceae                                            | present | no  |  |
|                             | <i>Dioscorea alata</i>           | 1 | terrestrial | autotrophic species | purple yam                                                       | present | no  |  |
|                             | <i>Erythranthe guttata</i>       | 3 | terrestrial | autotrophic species | seep monkey flower                                               | present | yes |  |
|                             | <i>Eucalyptus grandis</i>        | 3 | terrestrial | autotrophic species | flooded gum or rose gum                                          | present | yes |  |
|                             | <i>Euonymus alatus</i>           | 1 | terrestrial | autotrophic species | winged spindle                                                   | present | no  |  |
|                             | <i>Eutrema salsugineum</i>       | 3 | terrestrial | autotrophic species | rockcress                                                        | present | yes |  |
|                             | <i>Fragaria vesca</i>            | 3 | terrestrial | autotrophic species | strawberry                                                       | present | yes |  |
|                             | <i>Glycine max</i>               | 3 | terrestrial | autotrophic species | soybean                                                          | present | yes |  |
|                             | <i>Gossypium raimondii</i>       | 3 | terrestrial | autotrophic species | cotton plant                                                     | present | yes |  |
|                             | <i>Jatropha curcas</i>           | 3 | terrestrial | autotrophic species | physic nut, Barbados nut, poison nut, bubble bush or purging nut | present | yes |  |
|                             | <i>Lotus japonicus</i>           | 3 | terrestrial | autotrophic species | wild legume                                                      | present | yes |  |
|                             | <i>Malus domestica</i>           | 3 | terrestrial | autotrophic species | apple                                                            | present | yes |  |
|                             | <i>Medicago truncatula</i>       | 4 | terrestrial | autotrophic species | barrelclover                                                     | present | yes |  |
|                             | <i>Nelumbo nucifera</i>          | 3 | terrestrial | autotrophic species | Indian lotus                                                     | present | yes |  |
|                             | <i>Nicotiana sylvestris</i>      | 4 | terrestrial | autotrophic species | common domesticated tobacco                                      | present | yes |  |
|                             | <i>Nicotiana tomentosiformis</i> | 2 | terrestrial | autotrophic species | tobacco                                                          | present | no  |  |
|                             | <i>Panax ginseng</i>             | 1 | terrestrial | autotrophic species | ginseng                                                          | present | no  |  |



|                                                 |                                |   |             |                     |                                                 |         |     |      |
|-------------------------------------------------|--------------------------------|---|-------------|---------------------|-------------------------------------------------|---------|-----|------|
|                                                 | <i>Panicum virgatum</i>        | 1 | terrestrial | autotrophic species | switchgrass                                     | present | no  |      |
|                                                 | <i>Phaseolus vulgaris</i>      | 3 | terrestrial | autotrophic species | common bean                                     | present | yes |      |
|                                                 | <i>Populus euphratica</i>      | 4 | terrestrial | autotrophic species | Euphrates poplar or desert poplar               | present | yes |      |
|                                                 | <i>Populus trichocarpa</i>     | 2 | terrestrial | autotrophic species | black cottonwood                                | present | yes |      |
|                                                 | <i>Prunus mume</i>             | 3 | terrestrial | autotrophic species | Chinese plum or Japanese apricot                | present | yes |      |
|                                                 | <i>Pyrus bretschneideri</i>    | 3 | terrestrial | autotrophic species | Chinese white pear                              | present | yes |      |
|                                                 | <i>Rehmannia glutinosa</i>     | 1 | terrestrial | autotrophic species | use in Chinese traditional medicine             | absent  | no  | 1301 |
|                                                 | <i>Ricinus communis</i>        | 3 | terrestrial | autotrophic species | castorbean or castor-oil-plant                  | present | yes |      |
|                                                 | <i>Sesamum indicum</i>         | 3 | terrestrial | autotrophic species | sesame                                          | present | yes |      |
|                                                 | <i>Solanum lycopersicum</i>    | 4 | terrestrial | autotrophic species | tomato                                          | present | yes |      |
|                                                 | <i>Solanum tuberosum</i>       | 3 | terrestrial | autotrophic species | potato                                          | present | yes |      |
|                                                 | <i>Tarenaya hassleriana</i>    | 4 | terrestrial | autotrophic species | cleome hassleriana, spider flower or pink queen | present | yes |      |
|                                                 | <i>Theobroma cacao</i>         | 3 | terrestrial | autotrophic species | cacao or cocoa tree                             | present | yes |      |
|                                                 | <i>Triticum aestivum</i>       | 3 | terrestrial | autotrophic species | bread wheat                                     | present | yes |      |
|                                                 | <i>Triticum urartu</i>         | 1 | terrestrial | autotrophic species | red wild einkorn                                | present | yes |      |
|                                                 | <i>Vigna radiata</i>           | 4 | terrestrial | autotrophic species | mung bean                                       | present | yes |      |
|                                                 | <i>Vitis vinifera</i>          | 4 | terrestrial | autotrophic species | grape vine                                      | present | yes |      |
|                                                 | <i>Wolffia arrhiza</i>         | 1 | terrestrial | autotrophic species | spotless watermeal and rootless duckweed        | present | no  |      |
| <b>Angiospermes - Monocotylédons Liliopsida</b> |                                |   |             |                     |                                                 |         |     |      |
|                                                 | <i>Brachypodium distachyon</i> | 3 | terrestrial | autotrophic species | purple false brome or stiff brome               | present | yes |      |
|                                                 | <i>Elaeis guineensis</i>       | 2 | terrestrial | autotrophic species | oil palm or macaw-fat                           | present | yes |      |
|                                                 | <i>Hordeum vulgare</i>         | 2 | terrestrial | autotrophic species | barley                                          | present | yes |      |
|                                                 | <i>Musa acuminata</i>          | 3 | terrestrial | autotrophic species | banana species                                  | present | yes |      |
|                                                 | <i>Oryza brachyantha</i>       | 3 | terrestrial | autotrophic species | grass in the rice genus                         | present | yes |      |
|                                                 | <i>Phoenix dactylifera</i>     | 3 | terrestrial | autotrophic species | date palm                                       | present | yes |      |
|                                                 | <i>Setaria italica</i>         | 3 | terrestrial | autotrophic species | poales, foxtail millet                          | present | yes |      |
|                                                 | <i>Zea mays</i>                | 3 | terrestrial | autotrophic species | maize                                           | present | yes |      |
|                                                 | <i>Zostera marina</i>          | 2 | marine      | autotrophic species | common eelgrass, seawrack                       | present | yes |      |
